# Supplementary material for: Whole-Genome Analysis Reveals That Bacteriophages Promote Environmental Adaptation of Staphylococcus aureus via Gene Exchange, Acquisition, and Loss
Source: MDPI journal article supplement (doi:10.3390/v14061199), 2022-05-31
Supplement: s1 [file s1]

## Supplementary data

Whole-genome analysis reveals that bacteriophages promote environmental adaptation of  
*Staphylococcus aureus* via gene exchange, acquisition, and loss

Wen-yuan Zhou<sup>1,2</sup>, Hua wen<sup>1</sup>, Ya-jie Li<sup>1</sup>, Ya-jun gao<sup>1</sup>, Xiang-feng Zheng<sup>1</sup>, Lei Yuan<sup>1</sup>, Guo-qiang Zhu<sup>2</sup>, Zhen-quan Yang<sup>1\*</sup>

<sup>1</sup> College of Food Science and Engineering, Yangzhou University, Yangzhou, Jiangsu 225001, China

<sup>2</sup> College of Veterinary Medicine, Yangzhou University, Yangzhou, Jiangsu 225001, China

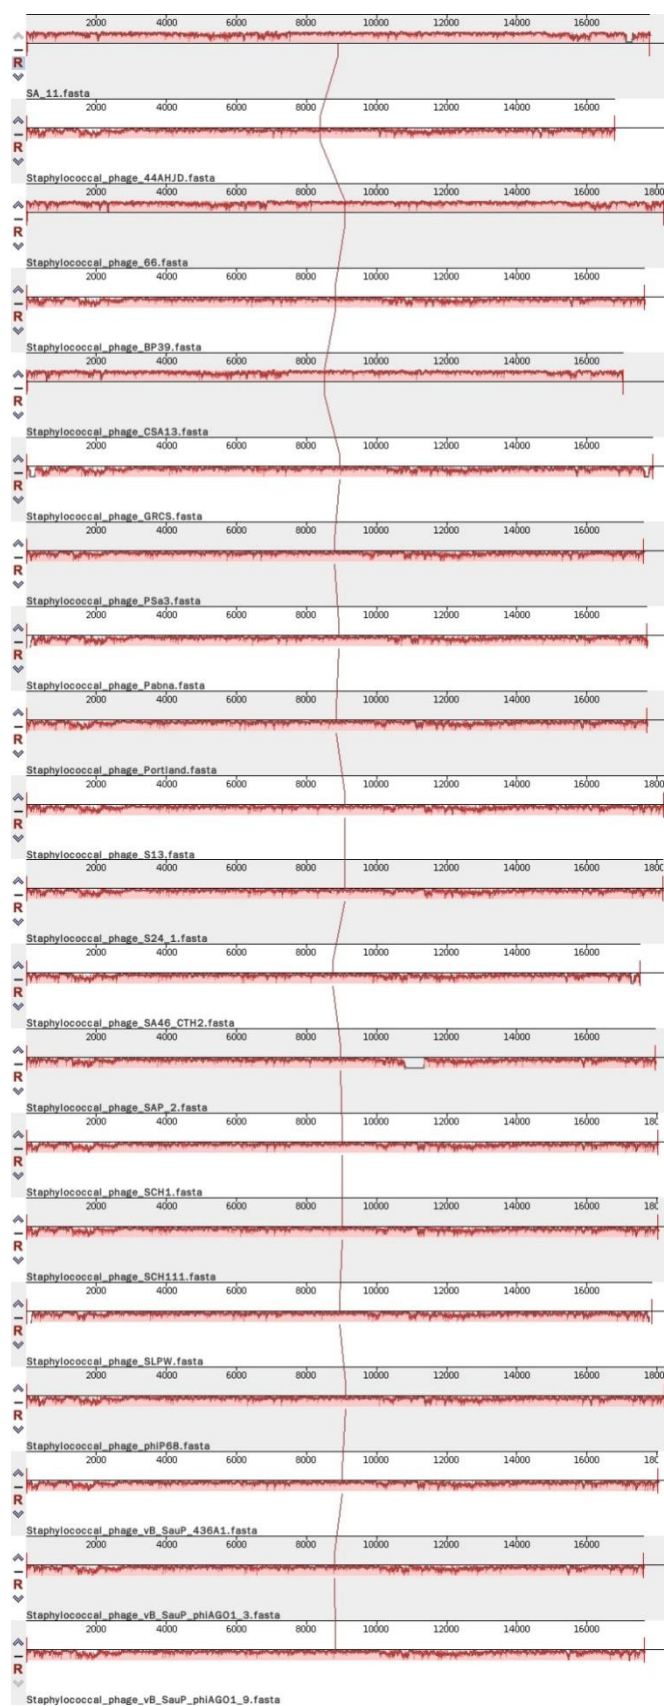

**Figure S1.** MARVE analysis of genomes of 20 Podoviridae phages in lineage I.

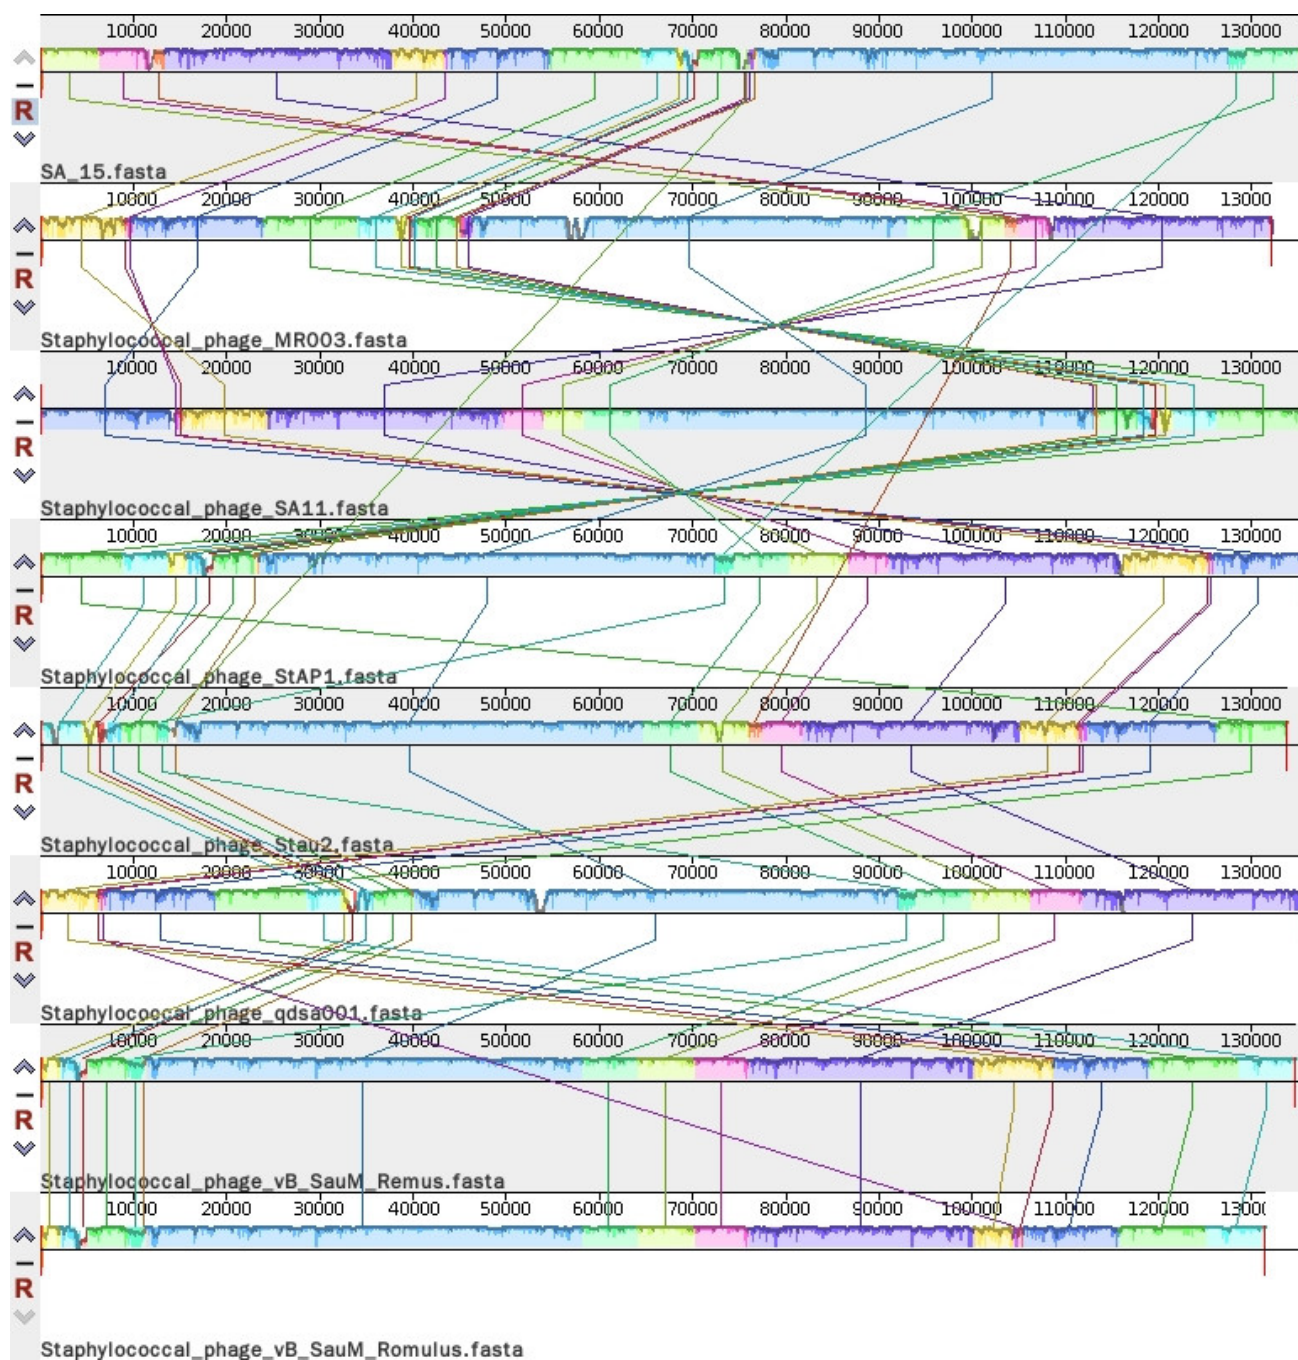

**Figure S2.** MARVE analysis of genomes of 8 Herelleviridae phages in clade IIa (lineage II).

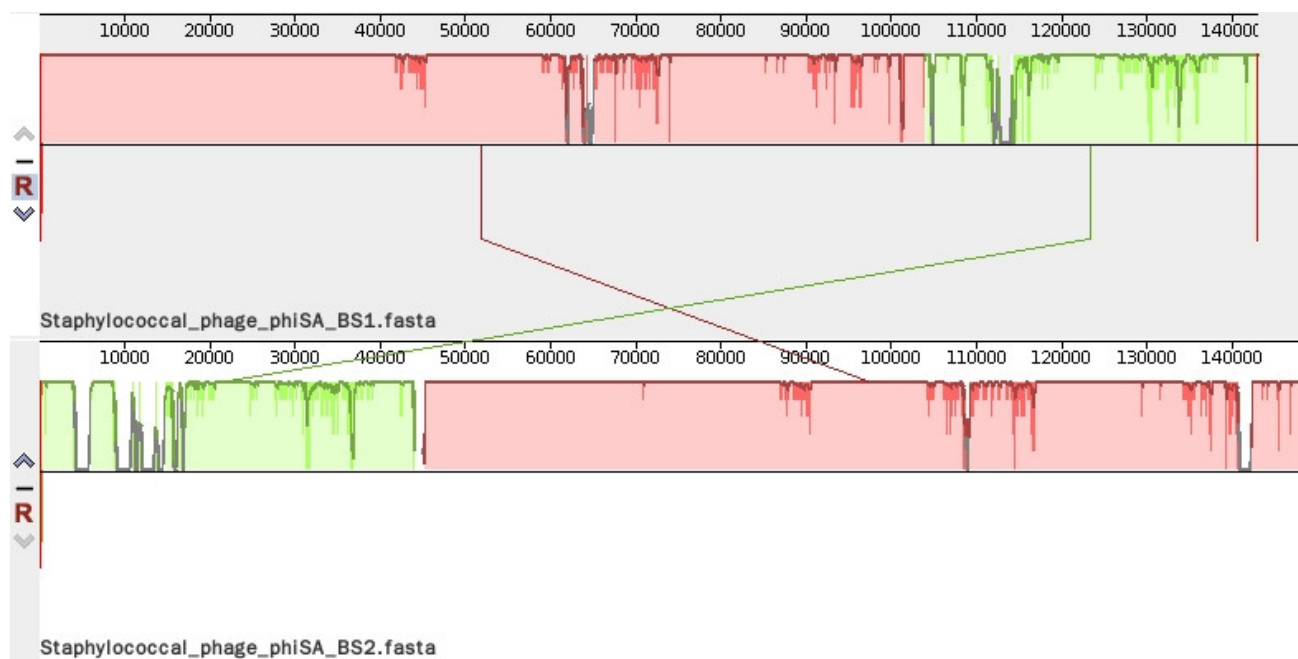

**Figure S3.** MARVE analysis of genomes of 2 Herelleviridae phages in clade IIb (lineage II).

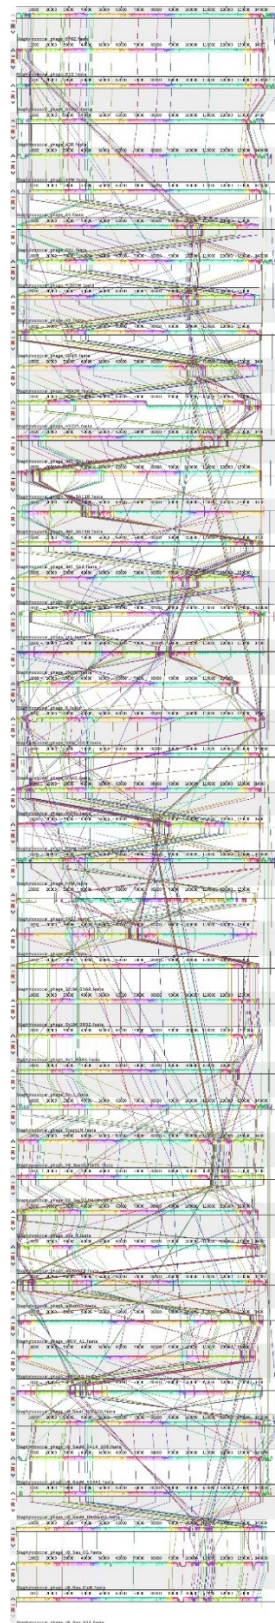

**Figure S4.** MARVE analysis of genomes of 46 Herelleviridae phages in clade IIe (lineage II).



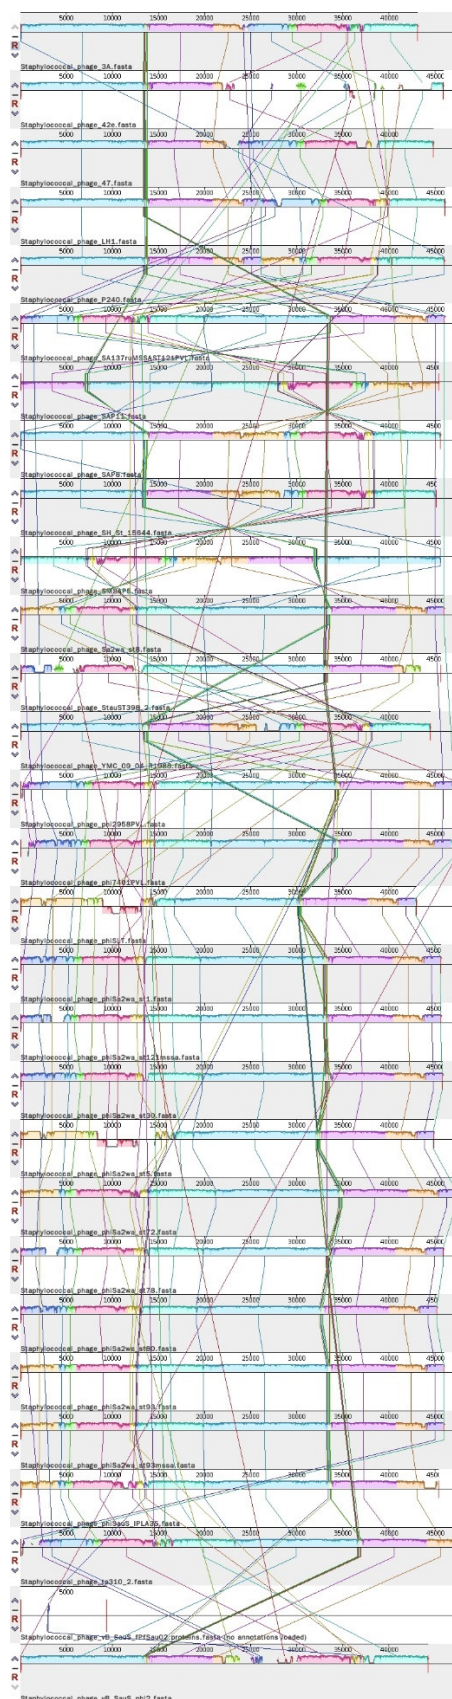

**Figure S5.** MARVE analysis of genomes of 29 Siphoviridae phages in clade IIIa (lineage III).

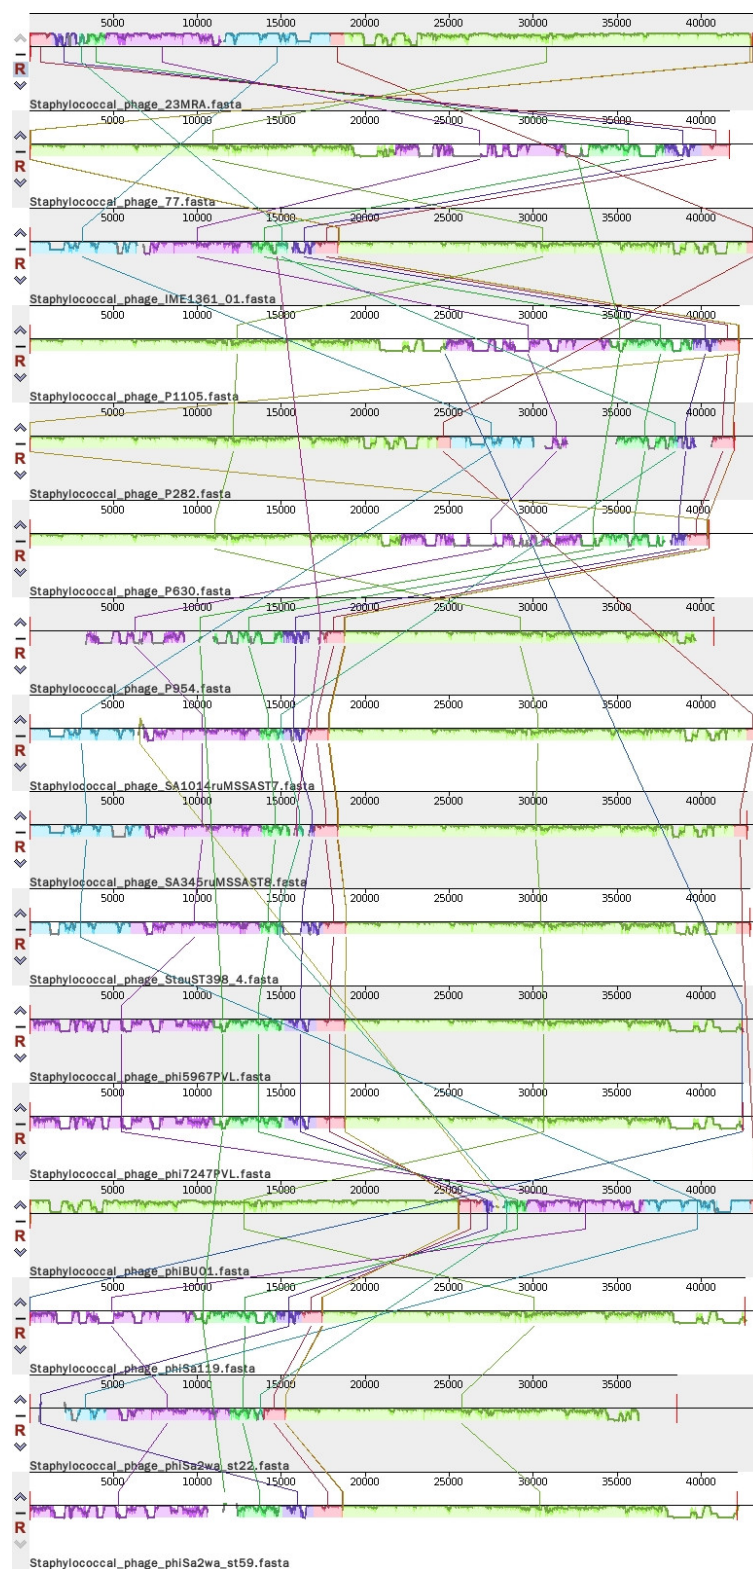

**Figure S6.** MARVE analysis of genomes of 16 Siphoviridae phages in clade IIIb (lineage III).

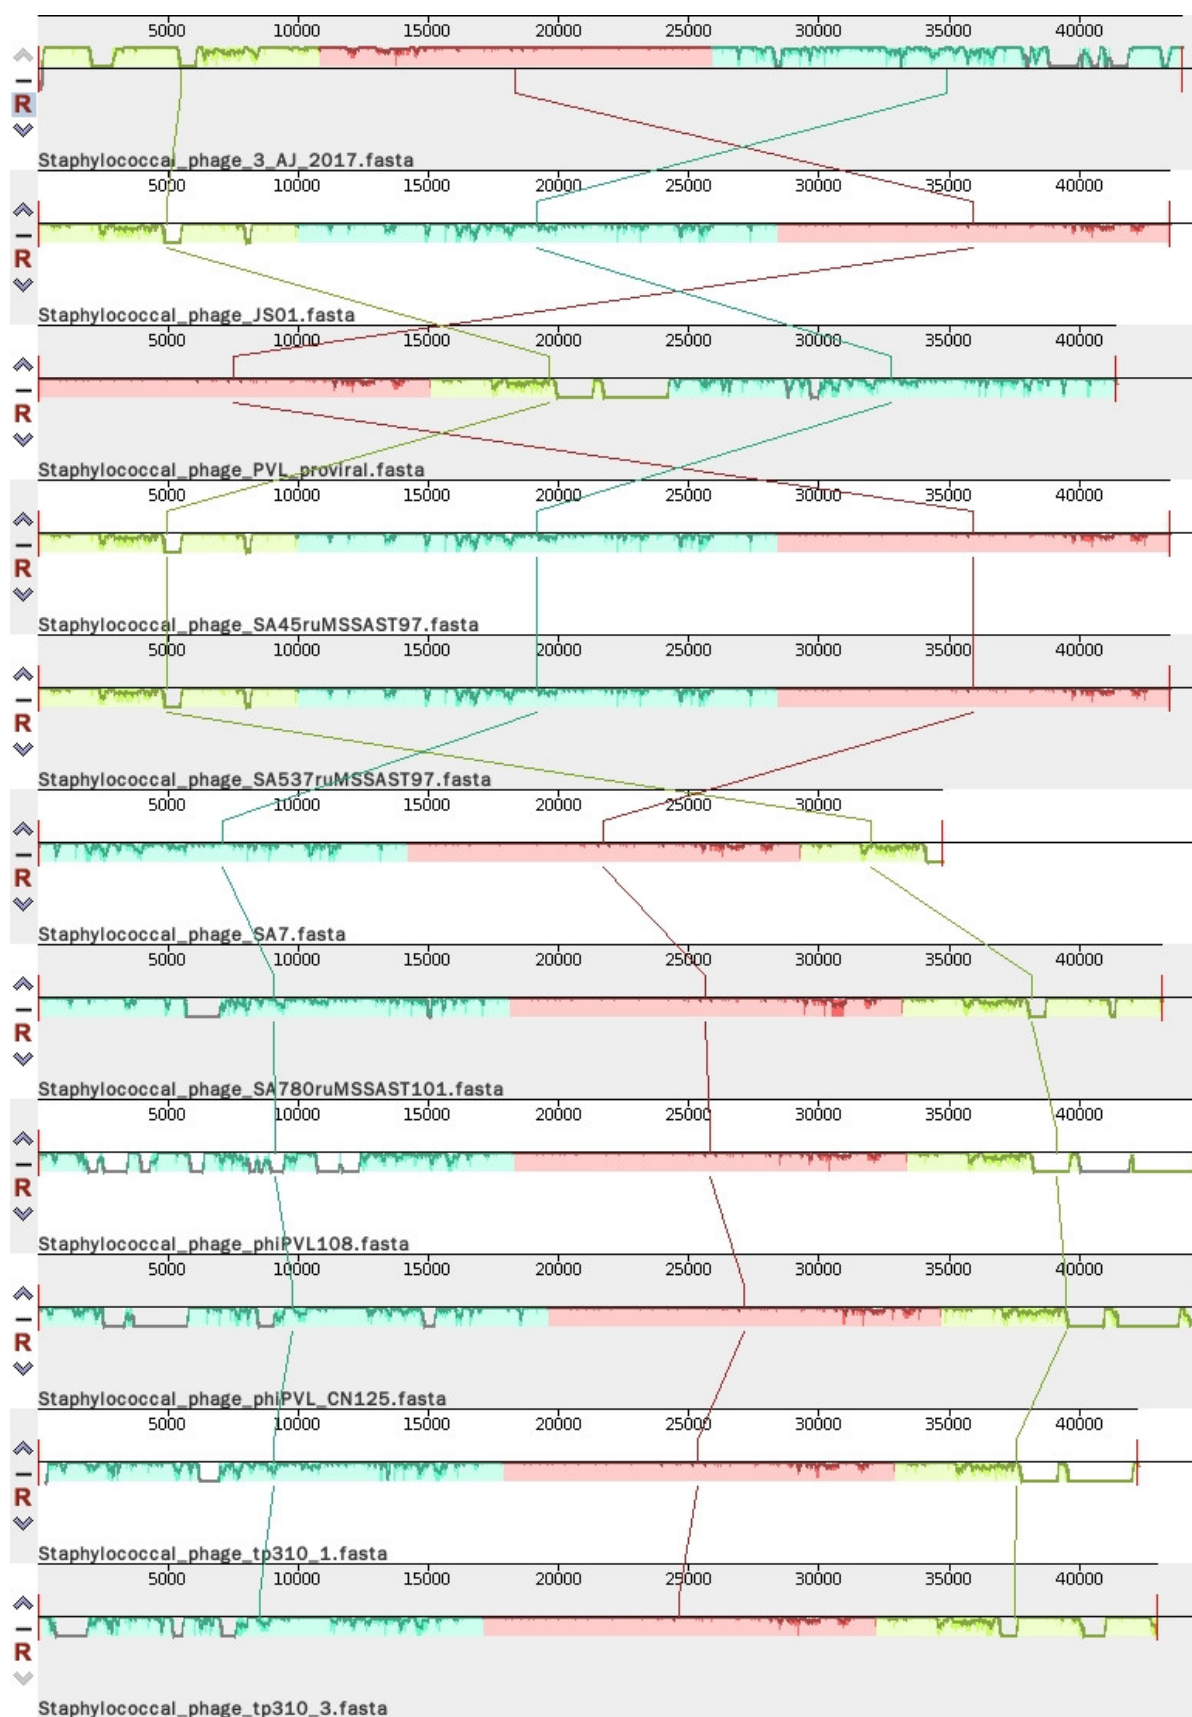

**Figure S7.** MARVE analysis of genomes of 11 Siphoviridae phages in clade IIIc (lineage III).



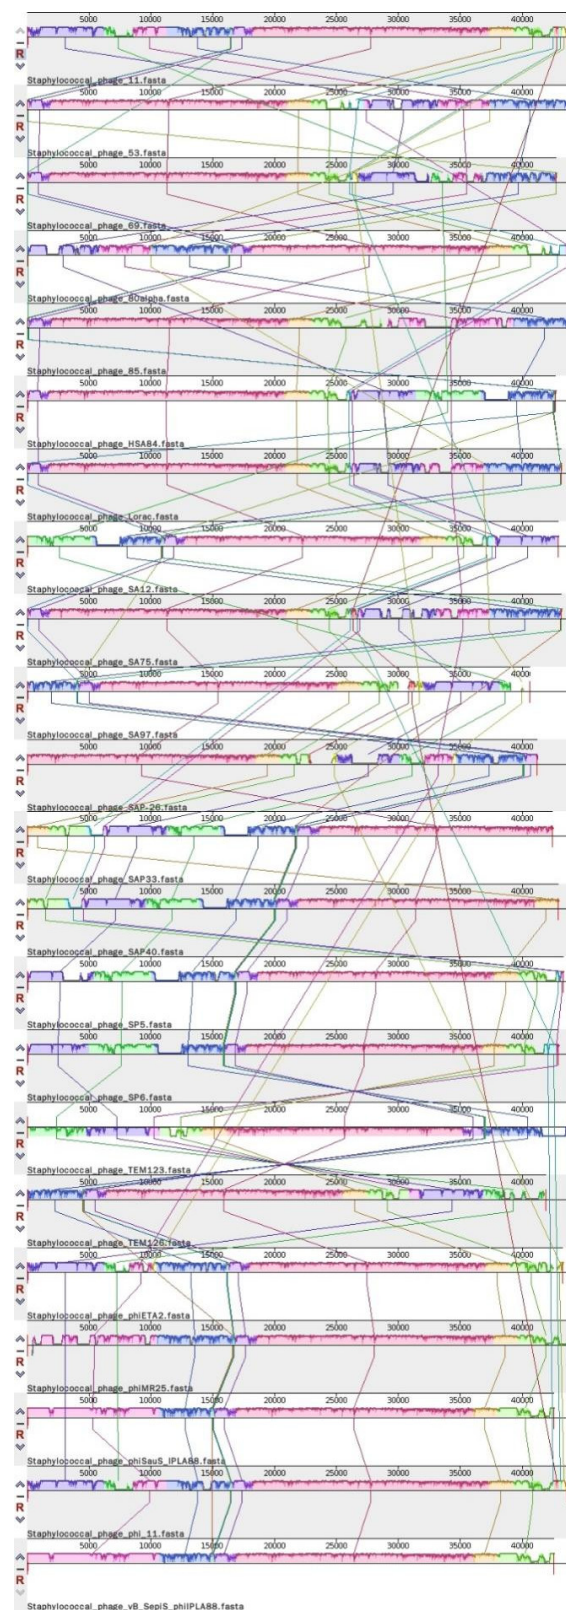

**Figure S8.** MARVE analysis of genomes of 22 Siphoviridae phages in clade IIId (lineage III).

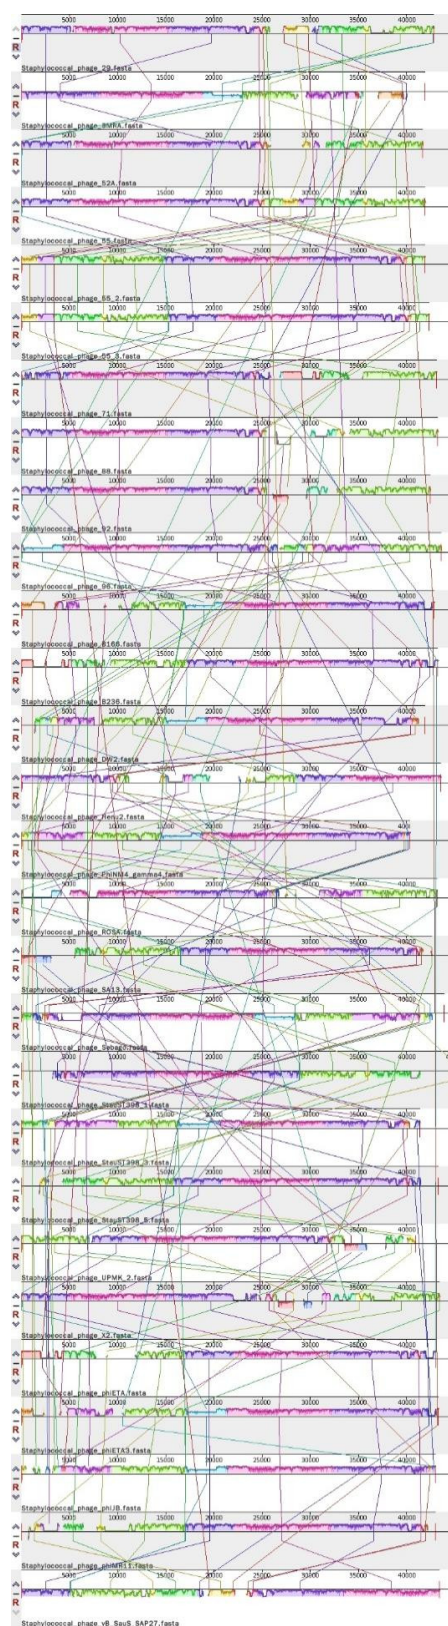

**Figure S9.** MARVE analysis of genomes of 28 Siphoviridae phages in clade IIIe (lineage III).

**Table S1.** Metadata for 189 phages publicly available on NCBI. The 189 phages comprise four data sets including genomes of 20 Podoviridae phages, 56 Herelleviridae phages, 112 Siphoviridae phages, and 1 Erwinia phage phiEa2809 as the outgroup.

| Strain                             | Genome length (bp) | GC content (%) | ORFs | tRNA | Isolation date | Geographic region | Organism     | Isolation source   | Genebank Accession |
|------------------------------------|--------------------|----------------|------|------|----------------|-------------------|--------------|--------------------|--------------------|
| <i>Staphylococcus aureus</i> phage |                    |                |      |      |                |                   |              |                    |                    |
| DW2                                | 41941              | 29.0           | 64   | 0    | Unknown        | Ireland           | Siphoviridae | Sewage             | NC_024391.1        |
| 3MRA                               | 41931              | 35.4           | 67   | 0    | Unknown        | United State      | Siphoviridae | Human              | NC_028917.1        |
| 23MRA                              | 43098              | 32.9           | 68   | 0    | Unknown        | United State      | Siphoviridae | Human              | NC_028775.1        |
| SMSAP5                             | 45552              | 33.4           | 65   | 0    | 2010           | South Korea       | Siphoviridae | Unknown            | NC_019513.1        |
| LH1                                | 46048              | 33.2           | 61   | 0    | 2009           | Canada            | Siphoviridae | Unknown            | JX174275.1         |
| vB_SauS_fPfSau02                   | 45108              | 33.7           | 69   | 0    | Unknown        | Finland           | Siphoviridae | Unknown            | MK348510.1         |
| tp310_1                            | 42232              | 33.5           | 57   | 0    | Unknown        | United State      | Siphoviridae | Unknown            | NC_009761.3        |
| 3_AJ_2017                          | 43922              | 33.3           | 66   | 0    | 2017           | Colombia          | Siphoviridae | Human              | KX232515.1         |
| phiSauS_IPLA88                     | 42526              | 34.9           | 63   | 0    | Unknown        | United State      | Siphoviridae | Unknown            | NC_011614.1        |
| phiSauS_IPLA35                     | 45344              | 33.2           | 64   | 0    | Unknown        | United State      | Siphoviridae | Unknown            | NC_011612.1        |
| phiPVL108                          | 44857              | 33.5           | 68   | 0    | Unknown        | United State      | Siphoviridae | Unknown            | NC_008689.1        |
| tp310_3                            | 42973              | 33.5           | 73   | 0    | Unknown        | United State      | Siphoviridae | Unknown            | NC_009763.3        |
| tp310_2                            | 47785              | 33.8           | 70   | 0    | Unknown        | United State      | Siphoviridae | Unknown            | NC_009762.3        |
| phiSLT                             | 42942              | 33.3           | 70   | 0    | Unknown        | Japan             | Siphoviridae | Unknown            | AB045978.2         |
| Sebago                             | 43878              | 35.3           | 68   | 0    | 2017           | United State      | Siphoviridae | Environmental swab | MK618716.1         |
| Lorac                              | 43147              | 34.5           | 67   | 0    | 2015           | United State      | Siphoviridae | Sewage             | MH321492.1         |
| vB_SauS_SAP27                      | 43444              | 35.0           | 69   | 0    | Unknown        | South Korea       | Siphoviridae | Unknown            | MN904510.1         |
| SA75                               | 43134              | 34.4           | 66   | 0    | Unknown        | South Korea       | Siphoviridae | Feces              | MT013111.1         |

|                    |       |      |     |   |         |                   |              |         |             |
|--------------------|-------|------|-----|---|---------|-------------------|--------------|---------|-------------|
| phi_11             | 43604 | 34.5 | 67  | 0 | Unknown | United State      | Siphoviridae | Unknown | AF424781.1  |
| vB_SepiS_phiIPLA88 | 42526 | 34.9 | 63  | 0 | Unknown | Spain             | Siphoviridae | Unknown | EU861004.1  |
| Sa2wa_st8          | 45914 | 33.1 | 63  | 0 | 2008    | Australia         | Siphoviridae | Human   | MK940809.1  |
| SAP40              | 42911 | 34.0 | 63  | 0 | Unknown | Republic of Korea | Siphoviridae | Unknown | MK801683.1  |
| SAP33              | 42414 | 34.0 | 64  | 0 | Unknown | Republic of Korea | Siphoviridae | Unknown | MK801682.1  |
| SAP11              | 45346 | 33.4 | 65  | 0 | Unknown | Republic of Korea | Siphoviridae | Unknown | MK801681.1  |
| SAP8               | 45533 | 33.4 | 65  | 0 | Unknown | Republic of Korea | Siphoviridae | Unknown | MK801680.1  |
| Henu2              | 43513 | 35.0 | 64  | 0 | 2017    | China             | Siphoviridae | Sewage  | MK211557.1  |
| VB_SauS_SA2        | 89055 | 31.9 | 131 | 1 | Unknown | China             | Siphoviridae | Unknown | MH356730.1  |
| HSA84              | 42650 | 34.5 | 60  | 0 | Unknown | Republic of Korea | Siphoviridae | Unknown | MG557619.1  |
| SA780ruMSSAST101   | 43184 | 33.5 | 65  | 0 | 2015    | Russia            | Siphoviridae | Human   | MH384260.1  |
| SA97               | 40592 | 34.2 | 61  | 0 | Unknown | South Korea       | Siphoviridae | Unknown | NC_029010.1 |
| B236               | 43228 | 35.6 | 66  | 0 | 2013    | Czech Republic    | Siphoviridae | Unknown | NC_028915.1 |
| vB_SauS_phi2       | 44222 | 33.7 | 61  | 0 | 2011    | Canada            | Siphoviridae | Unknown | NC_028862.1 |
| B166               | 42881 | 34.8 | 64  | 0 | 2012    | Czech Republic    | Siphoviridae | Unknown | NC_028859.1 |
| phiJB              | 43012 | 34.7 | 69  | 0 | 2011    | Czech Republic    | Siphoviridae | Unknown | NC_028669.1 |
| phiBU01            | 43748 | 33.0 | 67  | 0 | Unknown | United State      | Siphoviridae | Unknown | NC_026016.1 |
| phiSa119           | 42600 | 33.4 | 67  | 0 | Unknown | United State      | Siphoviridae | Unknown | NC_025460.1 |
| StauST398_5        | 43301 | 35.2 | 66  | 0 | Unknown | United State      | Siphoviridae | Unknown | NC_023500.1 |
| StauST398_4        | 42906 | 33.1 | 61  | 0 | Unknown | Switzerland       | Siphoviridae | Unknown | NC_023499.1 |
| YMC_09_04_R1988    | 44459 | 33.3 | 61  | 0 | Unknown | United State      | Siphoviridae | Unknown | NC_022758.1 |
| JS01               | 43458 | 33.3 | 63  | 0 | Unknown | China             | Siphoviridae | Milk    | NC_021773.2 |
| SA13               | 42652 | 35.4 | 66  | 0 | Unknown | United State      | Siphoviridae | Unknown | NC_021863.1 |
| SA12               | 42902 | 34.5 | 61  | 0 | Unknown | United State      | Siphoviridae | Unknown | NC_021801.1 |
| StauST398_3        | 41392 | 35.6 | 68  | 0 | 2011    | France            | Siphoviridae | Unknown | NC_021332.1 |



|                     |       |      |    |   |         |              |              |          |             |
|---------------------|-------|------|----|---|---------|--------------|--------------|----------|-------------|
| StauST398_1         | 45242 | 34.5 | 71 | 0 | 2011    | France       | Siphoviridae | Unknown  | NC_021326.1 |
| StauST398_2         | 45572 | 33.4 | 61 | 0 | 2011    | France       | Siphoviridae | Unknown  | NC_021323.1 |
| phi7401PVL          | 47252 | 33.1 | 67 | 0 | Unknown | United State | Siphoviridae | Unknown  | NC_020199.1 |
| phi5967PVL          | 42461 | 33.3 | 74 | 0 | Unknown | United State | Siphoviridae | Unknown  | NC_019921.1 |
| TEM123              | 43786 | 34.1 | 64 | 0 | 2011    | South Korea  | Siphoviridae | Unknown  | NC_017968.1 |
| P954                | 40761 | 34.0 | 64 | 0 | 2002    | India        | Siphoviridae | Unknown  | NC_013195.1 |
| phiPVL_CN125        | 44492 | 33.6 | 82 | 0 | Unknown | United State | Siphoviridae | Unknown  | NC_012784.1 |
| phi2958PVL          | 47342 | 33.0 | 65 | 0 | Unknown | United State | Siphoviridae | Hospital | NC_011344.1 |
| ROSA                | 43155 | 35.1 | 70 | 0 | Unknown | United State | Siphoviridae | Unknown  | NC_007058.1 |
| 2638A               | 41318 | 36.9 | 56 | 0 | Unknown | United State | Siphoviridae | Unknown  | NC_007051.1 |
| PVL_proviral        | 41401 | 33.5 | 63 | 0 | Unknown | United State | Siphoviridae | Unknown  | NC_002321.1 |
| SA137ruMSSAST121PVL | 45999 | 33.3 | 63 | 0 | 2007    | Russia       | Siphoviridae | Human    | MH384261.1  |
| SA1014ruMSSAST7     | 43504 | 33.1 | 63 | 0 | 2015    | Russia       | Siphoviridae | Human    | MH384259.1  |
| SH_St_15644         | 45111 | 33.4 | 64 | 0 | Unknown | China        | Siphoviridae | Sewage   | MG770897.1  |
| phiSa2wa_st121mssa  | 45621 | 33.1 | 61 | 0 | 1995    | Australia    | Siphoviridae | Unknown  | MG029518.1  |
| phiSa2wa_st93       | 45913 | 33.1 | 64 | 0 | 2003    | Australia    | Siphoviridae | Human    | MG029517.1  |
| phiSa2wa_st93mssa   | 45913 | 33.1 | 64 | 0 | 1995    | Australia    | Siphoviridae | Unknown  | MG029516.1  |
| phiSa2wa_st80       | 45164 | 33.3 | 62 | 0 | 2005    | Australia    | Siphoviridae | Human    | MG029515.1  |
| phiSa2wa_st78       | 45878 | 33.2 | 65 | 0 | 2008    | Australia    | Siphoviridae | Human    | MG029514.1  |
| phiSa2wa_st72       | 47213 | 33.2 | 67 | 0 | 2006    | Australia    | Siphoviridae | Human    | MG029513.1  |
| phiSa2wa_st59       | 42133 | 33.3 | 72 | 0 | 2003    | Australia    | Siphoviridae | Human    | MG029512.1  |
| phiSa2wa_st30       | 45780 | 33.5 | 61 | 0 | 2002    | Australia    | Siphoviridae | Human    | MG029511.1  |
| phiSa2wa_st22       | 38576 | 33.2 | 51 | 0 | 2007    | Australia    | Siphoviridae | Human    | MG029510.1  |
| phiSa2wa_st5        | 44823 | 33.4 | 72 | 0 | 2008    | Australia    | Siphoviridae | Human    | MG029509.1  |
| UPMK_2              | 40955 | 35.4 | 64 | 0 | Unknown | Malaysia     | Siphoviridae | Water    | MG564297.1  |

|               |       |      |    |   |         |                |              |         |             |
|---------------|-------|------|----|---|---------|----------------|--------------|---------|-------------|
| phiSa2wa_st1  | 45585 | 33.3 | 61 | 0 | 1995    | Australia      | Siphoviridae | Human   | MF580410.1  |
| P240          | 45985 | 33.1 | 67 | 0 | 2014    | Germany        | Siphoviridae | Unknown | KY056620.1  |
| P1105         | 42282 | 33.5 | 68 | 0 | 2013    | Germany        | Siphoviridae | Unknown | KT878766.1  |
| P630          | 40448 | 33.7 | 64 | 0 | 2015    | Germany        | Siphoviridae | Unknown | KT809369.1  |
| P282          | 41960 | 33.0 | 69 | 0 | 2015    | Germany        | Siphoviridae | Unknown | KT809368.1  |
| IME1361_01    | 43516 | 32.8 | 65 | 0 | Unknown | China          | Siphoviridae | Unknown | KY653123.1  |
| SA7           | 34730 | 34.1 | 51 | 0 | Unknown | South Korea    | Siphoviridae | Unknown | KY695153.1  |
| vB_SauS_IMEP5 | 44677 | 34.3 | 68 | 0 | 2015    | China          | Siphoviridae | Unknown | KX156762.1  |
| 55_3          | 42309 | 35.6 | 65 | 0 | Unknown | United Kingdom | Siphoviridae | Unknown | KR709303.1  |
| 55_2          | 41898 | 35.8 | 63 | 0 | Unknown | United Kingdom | Siphoviridae | Unknown | KR709302.1  |
| PhiNM4_gamma4 | 40365 | 35.1 | 65 | 0 | Unknown | United State   | Siphoviridae | Unknown | KP209285.1  |
| SP6           | 42902 | 34.5 | 61 | 0 | Unknown | South Korea    | Siphoviridae | Swine   | JX274647.1  |
| SP5           | 43305 | 34.5 | 64 | 0 | Unknown | South Korea    | Siphoviridae | Swine   | JX274646.1  |
| phi7247PVL    | 42481 | 33.3 | 74 | 0 | Unknown | Japan          | Siphoviridae | Unknown | AP011956.1  |
| TEM126        | 41882 | 33.7 | 62 | 0 | 2009    | South Korea    | Siphoviridae | Unknown | HQ127381.1  |
| 55            | 41902 | 35.7 | 63 | 0 | Unknown | Canada         | Siphoviridae | Unknown | NC_007060.1 |
| 37            | 43681 | 35.1 | 65 | 0 | Unknown | Canada         | Siphoviridae | Unknown | NC_007055.1 |
| 3A            | 43095 | 33.5 | 62 | 0 | Unknown | Canada         | Siphoviridae | Unknown | NC_007053.1 |
| 77            | 41708 | 33.5 | 69 | 0 | Unknown | Canada         | Siphoviridae | Unknown | NC_005356.1 |
| SAP-26        | 41207 | 34.0 | 66 | 0 | Unknown | South Korea    | Siphoviridae | Unknown | NC_014460.1 |
| phiMR25       | 44342 | 34.3 | 72 | 0 | Unknown | Japan          | Siphoviridae | Unknown | NC_010808.1 |
| phiMR11       | 43011 | 35.6 | 69 | 0 | Unknown | Japan          | Siphoviridae | Unknown | NC_010147.1 |
| 80alpha       | 43864 | 34.1 | 68 | 0 | Unknown | United State   | Siphoviridae | Unknown | NC_009526.1 |
| phiETA3       | 43282 | 34.9 | 67 | 0 | Unknown | Japan          | Siphoviridae | Unknown | NC_008799.1 |
| phiETA2       | 43265 | 34.2 | 69 | 0 | Unknown | Japan          | Siphoviridae | Unknown | NC_008798.1 |

|                  |        |      |     |   |         |              |                |         |             |
|------------------|--------|------|-----|---|---------|--------------|----------------|---------|-------------|
| 92               | 42431  | 35.7 | 63  | 0 | Unknown | Canada       | Siphoviridae   | Unknown | NC_007064.1 |
| 88               | 43231  | 35.5 | 66  | 0 | Unknown | Canada       | Siphoviridae   | Unknown | NC_007063.1 |
| 52A              | 41690  | 35.5 | 58  | 0 | Unknown | Canada       | Siphoviridae   | Unknown | NC_007062.1 |
| 29               | 42802  | 35.3 | 65  | 0 | Unknown | Canada       | Siphoviridae   | Unknown | NC_007061.1 |
| 71               | 43114  | 35.2 | 66  | 0 | Unknown | Canada       | Siphoviridae   | Unknown | NC_007059.1 |
| 96               | 43576  | 35.0 | 71  | 0 | Unknown | Canada       | Siphoviridae   | Unknown | NC_007057.1 |
| EW               | 45286  | 36.0 | 68  | 0 | Unknown | Canada       | Siphoviridae   | Unknown | NC_007056.1 |
| 47               | 44777  | 33.5 | 61  | 0 | Unknown | Canada       | Siphoviridae   | Unknown | NC_007054.1 |
| 42c              | 45861  | 33.7 | 67  | 0 | Unknown | Canada       | Siphoviridae   | Unknown | NC_007052.1 |
| 53               | 43883  | 34.1 | 69  | 0 | Unknown | Canada       | Siphoviridae   | Unknown | NC_007049.1 |
| 69               | 42732  | 34.3 | 66  | 0 | Unknown | Canada       | Siphoviridae   | Unknown | NC_007048.1 |
| 187              | 39620  | 34.3 | 66  | 0 | Unknown | Canada       | Siphoviridae   | Unknown | NC_007047.1 |
| 85               | 44283  | 34.5 | 68  | 0 | Unknown | Canada       | Siphoviridae   | Unknown | NC_007050.1 |
| X2               | 43440  | 36.0 | 65  | 0 | Unknown | Canada       | Siphoviridae   | Unknown | NC_007065.1 |
| 11               | 43604  | 34.5 | 67  | 0 | Unknown | United State | Siphoviridae   | Unknown | NC_004615.1 |
| phiETA           | 43081  | 35.4 | 66  | 0 | Unknown | Japan        | Siphoviridae   | Unknown | AP001553.1  |
| SA345ruMSSAST8   | 42735  | 33.0 | 63  | 0 | 2015    | Russia       | Siphoviridae   | Human   | MH401416.1  |
| SA537ruMSSAST97  | 43458  | 33.4 | 66  | 0 | 2015    | Russia       | Siphoviridae   | Human   | MH401415.1  |
| SA45ruMSSAST97   | 43454  | 33.4 | 66  | 0 | 2007    | Russia       | Siphoviridae   | Human   | MH401414.1  |
| MR003            | 132152 | 30.0 | 186 | 0 | 2018    | Japan        | Herelleviridae | Sewage  | AP019522.1  |
| 676Z             | 148564 | 30.5 | 234 | 4 | Unknown | Poland       | Herelleviridae | Unknown | JX080302.2  |
| A3R              | 141018 | 30.5 | 214 | 4 | Unknown | Poland       | Herelleviridae | Unknown | JX080301.2  |
| 812              | 142096 | 30.4 | 220 | 4 | 1957    | Germany      | Herelleviridae | Unknown | NC_029080.1 |
| vB_SauM_fRuSau02 | 148464 | 30.2 | 234 | 4 | Unknown | Finland      | Herelleviridae | Unknown | MF398190.1  |
| MSA6             | 148243 | 30.2 | 236 | 4 | Unknown | Poland       | Herelleviridae | Unknown | JX080304.2  |

|                |        |      |     |   |         |              |                |                    |             |
|----------------|--------|------|-----|---|---------|--------------|----------------|--------------------|-------------|
| P4W            | 147590 | 30.4 | 234 | 4 | Unknown | Poland       | Herelleviridae | Unknown            | JX080305.2  |
| Fi200W         | 148481 | 30.4 | 234 | 4 | Unknown | Poland       | Herelleviridae | Unknown            | JX080303.2  |
| Staph1N        | 145647 | 30.5 | 233 | 4 | Unknown | Poland       | Herelleviridae | Unknown            | JX080300.2  |
| A5W            | 145542 | 30.5 | 233 | 4 | Unknown | Poland       | Herelleviridae | Unknown            | EU418428.2  |
| K              | 127395 | 30.6 | 182 | 4 | Unknown | Ireland      | Herelleviridae | Unknown            | AY176327.1  |
| Sb1M_9832      | 138231 | 30.5 | 214 | 4 | Unknown | United State | Herelleviridae | Unknown            | MN336263.1  |
| Sb1M_6168      | 138231 | 30.5 | 214 | 4 | Unknown | United State | Herelleviridae | Unknown            | MN336262.1  |
| Sb1_8383       | 139606 | 30.4 | 216 | 4 | Unknown | United State | Herelleviridae | Unknown            | MN336261.1  |
| Sb_1           | 127188 | 30.4 | 182 | 4 | Unknown | United State | Herelleviridae | Unknown            | NC_023009.1 |
| VB_SavM_JYL01  | 141384 | 30.2 | 223 | 4 | 2017    | China        | Herelleviridae | Sewage             | MH159197.1  |
| qdsa002        | 142499 | 30.3 | 228 | 4 | Unknown | China        | Herelleviridae | Sewage             | KY779849.1  |
| Maine          | 141712 | 30.4 | 220 | 4 | 2018    | United State | Herelleviridae | Environmental swab | MN045228.1  |
| JD007          | 141836 | 30.3 | 223 | 4 | Unknown | China        | Herelleviridae | Hospital           | NC_019726.1 |
| phiSA012       | 142094 | 30.3 | 215 | 3 | Unknown | Japan        | Herelleviridae | Unknown            | NC_023573.1 |
| VB_SavM_JYL02  | 141384 | 30.2 | 224 | 4 | 2017    | China        | Herelleviridae | Sewage             | MK250904.1  |
| StAP1          | 135502 | 30.0 | 197 | 0 | 2013    | South Korea  | Herelleviridae | Soil               | KX532239.1  |
| Stau2          | 133798 | 30.0 | 188 | 0 | Unknown | China        | Herelleviridae | Unknown            | NC_030933.1 |
| SA11           | 136326 | 30.0 | 195 | 0 | 2009    | South Korea  | Herelleviridae | Sewage             | NC_019511.1 |
| B1             | 148884 | 30.2 | 237 | 4 | Unknown | Ireland      | Herelleviridae | Unknown            | MG656408.1  |
| JA1            | 147135 | 30.3 | 231 | 4 | Unknown | Ireland      | Herelleviridae | Unknown            | MF405094.1  |
| qdsa001        | 135563 | 29.8 | 195 | 0 | Unknown | China        | Herelleviridae | Sewage             | KY779848.1  |
| vB_SauH_IME522 | 140246 | 30.2 | 224 | 4 | Unknown | China        | Herelleviridae | Sewage             | MN304941.1  |
| vB_SauM_515A1  | 148511 | 30.2 | 234 | 4 | Unknown | Russian      | Herelleviridae | Human              | MN047438.1  |
| vBSP_A2        | 136528 | 30.4 | 208 | 4 | 2017    | China        | Herelleviridae | Sewage             | MK656892.1  |
| P108           | 140807 | 30.3 | 233 | 3 | Unknown | China        | Herelleviridae | Unknown            | NC_025426.1 |



|                  |        |      |     |   |         |                   |                |         |             |
|------------------|--------|------|-----|---|---------|-------------------|----------------|---------|-------------|
| MCE_2014         | 141907 | 30.4 | 214 | 4 | Unknown | United Kingdom    | Herelleviridae | Unknown | NC_025416.1 |
| vB_SauM_Remus    | 134643 | 29.9 | 191 | 1 | Unknown | Belgium           | Herelleviridae | Unknown | NC_022090.1 |
| GH15             | 139806 | 30.3 | 216 | 4 | Unknown | China             | Herelleviridae | Unknown | NC_019448.1 |
| vBSM_A1          | 140654 | 30.3 | 217 | 4 | 2017    | China             | Herelleviridae | Sewage  | MK584893.1  |
| CH1              | 138057 | 30.5 | 224 | 4 | Unknown | Russian           | Herelleviridae | Unknown | MK331930.1  |
| 812h1            | 150582 | 30.4 | 243 | 4 | 2016    | Czech Republic    | Herelleviridae | Unknown | MH844529.1  |
| HSA30            | 140358 | 30.2 | 224 | 4 | Unknown | Republic of Korea | Herelleviridae | Unknown | MG557618.1  |
| HYZ21            | 139675 | 30.4 | 218 | 4 | 2016    | China             | Herelleviridae | Human   | MH136584.1  |
| vB_SauM_Romulus  | 131332 | 30.0 | 182 | 1 | Unknown | United State      | Herelleviridae | Unknown | NC_020877.1 |
| vB_SauM_0414_108 | 151627 | 30.4 | 247 | 4 | Unknown | United State      | Herelleviridae | Unknown | MH107769.1  |
| phiSA_BS2        | 149229 | 29.7 | 227 | 1 | Unknown | China             | Herelleviridae | Bovine  | MH028956.1  |
| phiSA_BS1        | 142978 | 29.8 | 216 | 1 | Unknown | China             | Herelleviridae | Bovine  | MH078572.1  |
| vB_Sau_S24       | 139997 | 30.8 | 210 | 2 | Unknown | Argentina         | Herelleviridae | Unknown | KY794643.1  |
| vB_Sau_Clo6      | 143734 | 30.8 | 215 | 1 | Unknown | Argentina         | Herelleviridae | Unknown | KY794642.1  |
| vB_Sau_CG        | 142934 | 30.5 | 222 | 5 | Unknown | Argentina         | Herelleviridae | Unknown | KY794641.1  |
| pSa_3            | 137836 | 30.4 | 212 | 4 | 2016    | South Korea       | Herelleviridae | Unknown | KY581279.1  |
| IME_SA119        | 141028 | 30.3 | 220 | 4 | Unknown | China             | Herelleviridae | Sewage  | KR908644.1  |
| IME_SA118        | 139750 | 30.3 | 215 | 4 | 2014    | China             | Herelleviridae | Sewage  | KR902361.1  |
| IME_SA2          | 140906 | 30.3 | 226 | 4 | Unknown | China             | Herelleviridae | Sewage  | KP687432.1  |
| IME_SA1          | 140218 | 30.3 | 223 | 4 | Unknown | China             | Herelleviridae | Sewage  | KP687431.1  |
| SA5              | 137031 | 30.5 | 224 | 4 | Unknown | United State      | Herelleviridae | Unknown | JX875065.1  |
| ISP              | 138339 | 30.5 | 213 | 4 | Unknown | Georgia           | Herelleviridae | Unknown | FR852584.1  |
| Twort            | 130706 | 30.2 | 179 | 1 | Unknown | Canada            | Herelleviridae | Unknown | NC_007021.1 |
| G1               | 138715 | 30.4 | 213 | 4 | Unknown | Canada            | Herelleviridae | Unknown | NC_007066.1 |
| SapYZU15         | 135178 | 29.8 | 187 | 0 | 2020    | China             | Herelleviridae | Sewage  | MW864252    |

|                         |       |      |    |   |         |              |             |                    |             |
|-------------------------|-------|------|----|---|---------|--------------|-------------|--------------------|-------------|
| SapYZU11                | 17790 | 28.8 | 22 | 0 | 2020    | China        | Podoviridae | Sewage             | MW864250    |
| Portland                | 17711 | 29.3 | 18 | 0 | 2015    | United State | Podoviridae | Environmental swab | MN098325.1  |
| SA46_CTH2               | 17505 | 28.8 | 19 | 0 | 2017    | Japan        | Podoviridae | Chicken            | MK764384.1  |
| vB_SauP_436A1           | 18028 | 29.3 | 21 | 0 | 2019    | Russia       | Podoviridae | Human              | MN150710.1  |
| GRCS                    | 17869 | 28.9 | 20 | 0 | Unknown | India        | Podoviridae | Unknown            | NC_023550.1 |
| SAP_2                   | 17938 | 29.0 | 21 | 0 | Unknown | South Korea  | Podoviridae | Sewage             | NC_009875.1 |
| CSA13                   | 17034 | 28.9 | 18 | 0 | 2017    | South Korea  | Podoviridae | Swine              | MH107118.1  |
| Pabna                   | 17700 | 29.4 | 21 | 0 | 2015    | United State | Podoviridae | Sewage             | MH972260.1  |
| BP39                    | 17641 | 29.1 | 21 | 0 | 2002    | Canada       | Podoviridae | Sewage             | NC_031046.1 |
| SLPW                    | 17861 | 29.3 | 20 | 0 | 2013    | China        | Podoviridae | Unknown            | NC_031008.1 |
| S24_1                   | 18168 | 28.9 | 21 | 0 | Unknown | Japan        | Podoviridae | Sewage             | NC_016565.1 |
| 66                      | 18199 | 29.2 | 21 | 0 | Unknown | United State | Podoviridae | Unknown            | NC_007046.1 |
| phiP68                  | 18227 | 29.3 | 19 | 0 | Unknown | United State | Podoviridae | Unknown            | NC_004679.1 |
| vB_SauP_phiAGO1_9       | 17637 | 28.9 | 20 | 0 | Unknown | Poland       | Podoviridae | Unknown            | MG766219.2  |
| vB_SauP_phiAGO1_3       | 17603 | 28.9 | 20 | 0 | Unknown | Poland       | Podoviridae | Unknown            | MG766218.1  |
| SCH111                  | 18018 | 29.3 | 22 | 0 | Unknown | Russian      | Podoviridae | Unknown            | KY000085.1  |
| SCH1                    | 18023 | 29.3 | 21 | 0 | Unknown | Russian      | Podoviridae | Unknown            | KY000084.1  |
| PSa3                    | 17602 | 29.6 | 18 | 0 | Unknown | Germany      | Podoviridae | Unknown            | HF937074.1  |
| S13                     | 18186 | 29.2 | 21 | 0 | Unknown | Japan        | Podoviridae | Sewage             | AB626963.1  |
| 44AHJD                  | 16784 | 29.6 | 18 | 0 | Unknown | Austria      | Podoviridae | Unknown            | NC_004678.1 |
| <b>Outgroup</b>         |       |      |    |   |         |              |             |                    |             |
| Erwinia_phage_phiEa2809 |       |      |    |   |         |              |             |                    | NC_027340.1 |

Table S2. Orthogroup clusters of the lineage I, clade IIa – clade IIc, clade IIIa- IIIe phages.

| ORFs                   | Protein(aa) | Putative function                      | Best phage homolog | Identity(%) | Accession no. |
|------------------------|-------------|----------------------------------------|--------------------|-------------|---------------|
| <b>Lineage I, n=20</b> |             |                                        |                    |             |               |
| OG0000000              | 160         | hypothetical protein                   | SapYZU11           | 100         | MW864250      |
| OG0000001              | 120         | hypothetical protein                   | SapYZU11           | 100         | MW864250      |
| OG0000002              | 61          | hypothetical protein                   | SapYZU11           | 100         | MW864250      |
| OG0000003              | 409         | major head protein                     | SapYZU11           | 100         | MW864250      |
| OG0000004              | 328         | upper collar protein                   | SapYZU11           | 100         | MW864250      |
| OG0000005              | 252         | lower collar protein                   | SapYZU11           | 100         | MW864250      |
| OG0000006              | 648         | minor structural protein               | SapYZU11           | 100         | MW864250      |
| OG0000007              | 251         | lysin                                  | SapYZU11           | 100         | MW864250      |
| OG0000009              | 588         | tail fiber protein                     | SapYZU11           | 100         | MW864250      |
| OG0000010              | 140         | holin                                  | SapYZU11           | 100         | MW864250      |
| OG0000011              | 480         | lysin                                  | SapYZU11           | 100         | MW864250      |
| OG0000012              | 762         | DNA polymerase                         | SapYZU11           | 100         | MW864250      |
| OG0000013              | 416         | DNA packaging protein                  | SapYZU11           | 100         | MW864250      |
| OG0000014              | 123         | single-stranded DNA binding protein    | SapYZU11           | 100         | MW864250      |
| OG0000015              | 79          | hypothetical protein                   | SapYZU11           | 100         | MW864250      |
| OG0000016              | 101         | hypothetical protein                   | SapYZU11           | 100         | MW864250      |
| <b>Clade IIa, n=8</b>  |             |                                        |                    |             |               |
| OG0000000              | 307         | hypothetical protein                   | SapYZU15           | 100         | MW864252      |
| OG0000001              | 369         | putative transposase                   | SapYZU15           | 100         | MW864252      |
| OG0000002              | 146         | pentapeptide repeat-containing protein | SapYZU15           | 100         | MW864252      |
| OG0000003              | 171         | structural protein                     | SapYZU15           | 100         | MW864252      |
| OG0000004              | 190         | phage lysin                            | SapYZU15           | 100         | MW864252      |
| OG0000005              | 90          | DNA methylase                          | SapYZU15           | 100         | MW864252      |
| OG0000006              | 239         | HNH endonuclease family protein        | SapYZU15           | 100         | MW864252      |
| OG0000008              | 179         | terL                                   | SapYZU15           | 100         | MW864252      |
| OG0000009              | 1250        | putative DNA polymerase I              | SapYZU15           | 100         | MW864252      |
| OG0000011              | 189         | hypothetical protein                   | SapYZU15           | 100         | MW864252      |
| OG0000012              | 578         | DNA synthesis                          | SapYZU15           | 100         | MW864252      |
| OG0000013              | 161         | homing endonuclease                    | SapYZU15           | 100         | MW864252      |
| OG0000014              | 109         | hypothetical protein                   | SapYZU15           | 100         | MW864252      |
| OG0000015              | 107         | thioredoxin-like protein               | SapYZU15           | 100         | MW864252      |
| OG0000016              | 201         | hypothetical protein                   | SapYZU15           | 100         | MW864252      |
| OG0000017              | 101         | hypothetical protein                   | SapYZU15           | 100         | MW864252      |
| OG0000018              | 161         | hypothetical protein                   | SapYZU15           | 100         | MW864252      |
| OG0000019              | 368         | hypothetical protein                   | SapYZU15           | 100         | MW864252      |

|           |     |                                 |          |     |          |
|-----------|-----|---------------------------------|----------|-----|----------|
| OG0000020 | 75  | hypothetical protein            | SapYZU15 | 100 | MW864252 |
| OG0000021 | 323 | hypothetical protein            | SapYZU15 | 100 | MW864252 |
| OG0000022 | 309 | putative DNA repair recombinase | SapYZU15 | 100 | MW864252 |
| OG0000023 | 118 | hypothetical protein            | SapYZU15 | 100 | MW864252 |
| OG0000024 | 220 | sigma factor                    | SapYZU15 | 100 | MW864252 |
| OG0000025 | 211 | structural protein              | SapYZU15 | 100 | MW864252 |
| OG0000026 | 85  | hypothetical protein            | SapYZU15 | 100 | MW864252 |
| OG0000027 | 257 | hypothetical protein            | SapYZU15 | 100 | MW864252 |
| OG0000028 | 418 | hypothetical protein            | SapYZU15 | 100 | MW864252 |
| OG0000029 | 110 | putative membrane protein       | SapYZU15 | 100 | MW864252 |
| OG0000030 | 178 | hypothetical protein            | SapYZU15 | 100 | MW864252 |
| OG0000031 | 254 | hypothetical protein            | SapYZU15 | 100 | MW864252 |
| OG0000032 | 169 | hypothetical protein            | SapYZU15 | 100 | MW864252 |
| OG0000033 | 285 | hypothetical protein            | SapYZU15 | 100 | MW864252 |
| OG0000034 | 244 | hypothetical protein            | SapYZU15 | 100 | MW864252 |
| OG0000035 | 153 | hypothetical protein            | SapYZU15 | 100 | MW864252 |
| OG0000036 | 146 | hypothetical protein            | SapYZU15 | 100 | MW864252 |
| OG0000037 | 212 | hypothetical protein            | SapYZU15 | 100 | MW864252 |
| OG0000038 | 133 | hypothetical protein            | SapYZU15 | 100 | MW864252 |
| OG0000039 | 84  | hypothetical protein            | SapYZU15 | 100 | MW864252 |
| OG0000040 | 88  | hypothetical protein            | SapYZU15 | 100 | MW864252 |
| OG0000041 | 95  | hypothetical protein            | SapYZU15 | 100 | MW864252 |
| OG0000042 | 98  | hypothetical protein            | SapYZU15 | 100 | MW864252 |
| OG0000043 | 105 | hypothetical protein            | SapYZU15 | 100 | MW864252 |
| OG0000044 | 82  | hypothetical protein            | SapYZU15 | 100 | MW864252 |
| OG0000045 | 166 | hypothetical protein            | SapYZU15 | 100 | MW864252 |
| OG0000046 | 184 | hypothetical protein            | SapYZU15 | 100 | MW864252 |
| OG0000047 | 69  | hypothetical protein            | SapYZU15 | 100 | MW864252 |
| OG0000048 | 86  | hypothetical protein            | SapYZU15 | 100 | MW864252 |
| OG0000049 | 105 | hypothetical protein            | SapYZU15 | 100 | MW864252 |
| OG0000050 | 94  | hypothetical protein            | SapYZU15 | 100 | MW864252 |
| OG0000051 | 85  | hypothetical protein            | SapYZU15 | 100 | MW864252 |
| OG0000052 | 105 | hypothetical protein            | SapYZU15 | 100 | MW864252 |
| OG0000053 | 227 | hypothetical protein            | SapYZU15 | 100 | MW864252 |
| OG0000054 | 80  | hypothetical protein            | SapYZU15 | 100 | MW864252 |
| OG0000055 | 117 | YopX protein                    | SapYZU15 | 100 | MW864252 |
| OG0000056 | 66  | phage protein                   | SapYZU15 | 100 | MW864252 |
| OG0000057 | 180 | hypothetical protein            | SapYZU15 | 100 | MW864252 |
| OG0000058 | 262 | DNA-binding protein             | SapYZU15 | 100 | MW864252 |
| OG0000059 | 121 | nuclease                        | SapYZU15 | 100 | MW864252 |



|           |     |                                |          |     |          |
|-----------|-----|--------------------------------|----------|-----|----------|
| OG0000060 | 108 | hypothetical protein           | SapYZU15 | 100 | MW864252 |
| OG0000061 | 139 | hypothetical protein           | SapYZU15 | 100 | MW864252 |
| OG0000062 | 68  | hypothetical protein           | SapYZU15 | 100 | MW864252 |
| OG0000063 | 54  | hypothetical protein           | SapYZU15 | 100 | MW864252 |
| OG0000064 | 681 | hypothetical protein           | SapYZU15 | 100 | MW864252 |
| OG0000065 | 88  | hypothetical protein           | SapYZU15 | 100 | MW864252 |
| OG0000066 | 58  | LysM domain-containing protein | SapYZU15 | 100 | MW864252 |
| OG0000067 | 208 | hypothetical protein           | SapYZU15 | 100 | MW864252 |
| OG0000068 | 198 | hypothetical protein           | SapYZU15 | 100 | MW864252 |
| OG0000069 | 88  | hypothetical protein           | SapYZU15 | 100 | MW864252 |
| OG0000070 | 142 | ribonuclease H                 | SapYZU15 | 100 | MW864252 |
| OG0000071 | 63  | hypothetical protein           | SapYZU15 | 100 | MW864252 |
| OG0000072 | 213 | hypothetical protein           | SapYZU15 | 100 | MW864252 |
| OG0000073 | 72  | hypothetical protein           | SapYZU15 | 100 | MW864252 |
| OG0000074 | 74  | hypothetical protein           | SapYZU15 | 100 | MW864252 |
| OG0000076 | 167 | holin                          | SapYZU15 | 100 | MW864252 |
| OG0000077 | 63  | hypothetical protein           | SapYZU15 | 100 | MW864252 |
| OG0000078 | 72  | hypothetical protein           | SapYZU15 | 100 | MW864252 |
| OG0000079 | 72  | hypothetical protein           | SapYZU15 | 100 | MW864252 |
| OG0000080 | 111 | hypothetical protein           | SapYZU15 | 100 | MW864252 |
| OG0000081 | 111 | hypothetical protein           | SapYZU15 | 100 | MW864252 |
| OG0000082 | 129 | hypothetical protein           | SapYZU15 | 100 | MW864252 |
| OG0000083 | 94  | hypothetical protein           | SapYZU15 | 100 | MW864252 |
| OG0000084 | 138 | hypothetical protein           | SapYZU15 | 100 | MW864252 |
| OG0000085 | 80  | hypothetical protein           | SapYZU15 | 100 | MW864252 |
| OG0000086 | 267 | hypothetical protein           | SapYZU15 | 100 | MW864252 |
| OG0000087 | 58  | hypothetical protein           | SapYZU15 | 100 | MW864252 |
| OG0000088 | 160 | hypothetical protein           | SapYZU15 | 100 | MW864252 |
| OG0000089 | 250 | hypothetical protein           | SapYZU15 | 100 | MW864252 |
| OG0000090 | 120 | hypothetical protein           | SapYZU15 | 100 | MW864252 |
| OG0000091 | 122 | putative portal protein        | SapYZU15 | 100 | MW864252 |
| OG0000092 | 294 | putative portal protein        | SapYZU15 | 100 | MW864252 |
| OG0000093 | 255 | hypothetical protein           | SapYZU15 | 100 | MW864252 |
| OG0000094 | 312 | Microtubule-associated protein | SapYZU15 | 100 | MW864252 |
| OG0000095 | 464 | major capsid protein           | SapYZU15 | 100 | MW864252 |
| OG0000096 | 78  | hypothetical protein           | SapYZU15 | 100 | MW864252 |
| OG0000097 | 250 | hypothetical protein           | SapYZU15 | 100 | MW864252 |
| OG0000098 | 292 | hypothetical protein           | SapYZU15 | 100 | MW864252 |
| OG0000099 | 207 | hypothetical protein           | SapYZU15 | 100 | MW864252 |
| OG0000100 | 279 | hypothetical protein           | SapYZU15 | 100 | MW864252 |

|           |      |                                             |          |     |          |
|-----------|------|---------------------------------------------|----------|-----|----------|
| OG0000101 | 69   | hypothetical protein                        | SapYZU15 | 100 | MW864252 |
| OG0000102 | 587  | tail sheath protein                         | SapYZU15 | 100 | MW864252 |
| OG0000103 | 123  | capsid protein                              | SapYZU15 | 100 | MW864252 |
| OG0000104 | 46   | major capsid protein                        | SapYZU15 | 100 | MW864252 |
| OG0000105 | 150  | hypothetical protein                        | SapYZU15 | 100 | MW864252 |
| OG0000106 | 103  | hypothetical protein                        | SapYZU15 | 100 | MW864252 |
| OG0000107 | 149  | hypothetical protein                        | SapYZU15 | 100 | MW864252 |
| OG0000108 | 153  | RNA polymerase                              | SapYZU15 | 100 | MW864252 |
| OG0000109 | 988  | tail lysin                                  | SapYZU15 | 100 | MW864252 |
| OG0000110 | 290  | hypothetical protein                        | SapYZU15 | 100 | MW864252 |
| OG0000111 | 275  | hypothetical protein                        | SapYZU15 | 100 | MW864252 |
| OG0000112 | 733  | tail lysin                                  | SapYZU15 | 100 | MW864252 |
| OG0000113 | 298  | tail lysin                                  | SapYZU15 | 100 | MW864252 |
| OG0000114 | 819  | glycerophosphoryl diester phosphodiesterase | SapYZU15 | 100 | MW864252 |
| OG0000115 | 284  | structural protein                          | SapYZU15 | 100 | MW864252 |
| OG0000116 | 174  | structural protein                          | SapYZU15 | 100 | MW864252 |
| OG0000117 | 235  | hypothetical protein                        | SapYZU15 | 100 | MW864252 |
| OG0000118 | 349  | baseplate J-like protein                    | SapYZU15 | 100 | MW864252 |
| OG0000119 | 901  | hypothetical protein                        | SapYZU15 | 100 | MW864252 |
| OG0000120 | 174  | structural protein                          | SapYZU15 | 100 | MW864252 |
| OG0000121 | 1153 | virulence-associated protein                | SapYZU15 | 100 | MW864252 |
| OG0000122 | 57   | hypothetical protein                        | SapYZU15 | 100 | MW864252 |
| OG0000123 | 638  | structural protein                          | SapYZU15 | 100 | MW864252 |
| OG0000124 | 119  | hypothetical protein                        | SapYZU15 | 100 | MW864252 |
| OG0000125 | 455  | hypothetical protein                        | SapYZU15 | 100 | MW864252 |
| OG0000126 | 152  | DNA helicase                                | SapYZU15 | 100 | MW864252 |
| OG0000127 | 438  | Type III restriction enzyme                 | SapYZU15 | 100 | MW864252 |
| OG0000128 | 529  | Rep protein                                 | SapYZU15 | 100 | MW864252 |
| OG0000129 | 480  | helicase/primase                            | SapYZU15 | 100 | MW864252 |
| OG0000130 | 82   | hypothetical protein                        | SapYZU15 | 100 | MW864252 |
| OG0000131 | 344  | DNA repair exonuclease                      | SapYZU15 | 100 | MW864252 |
| OG0000132 | 89   | hypothetical protein                        | SapYZU15 | 100 | MW864252 |
| OG0000133 | 493  | exonuclease                                 | SapYZU15 | 100 | MW864252 |
| OG0000134 | 198  | hypothetical protein                        | SapYZU15 | 100 | MW864252 |
| OG0000135 | 359  | DNA primase                                 | SapYZU15 | 100 | MW864252 |
| OG0000136 | 103  | hypothetical protein                        | SapYZU15 | 100 | MW864252 |
| OG0000137 | 146  | hypothetical protein                        | SapYZU15 | 100 | MW864252 |
| OG0000138 | 203  | hypothetical protein                        | SapYZU15 | 100 | MW864252 |
| OG0000139 | 446  | reductase                                   | SapYZU15 | 100 | MW864252 |

**Clade IIb, n=2**

|           |      |                                             |           |     |          |
|-----------|------|---------------------------------------------|-----------|-----|----------|
| OG0000000 | 172  | major tail protein                          | phiSA_BS2 | 100 | MH028956 |
| OG0000001 | 245  | nucleotide metabolism it produces dUMP      | phiSA_BS2 | 100 | MH028956 |
| OG0000002 | 326  | hypothetical protein                        | phiSA_BS2 | 100 | MH028956 |
| OG0000003 | 157  | hypothetical protein                        | phiSA_BS2 | 100 | MH028956 |
| OG0000004 | 91   | hypothetical protein                        | phiSA_BS2 | 100 | MH028956 |
| OG0000005 | 82   | hypothetical protein                        | phiSA_BS2 | 100 | MH028956 |
| OG0000006 | 176  | HNH homing endonuclease                     | phiSA_BS2 | 100 | MH028956 |
| OG0000007 | 135  | YopX protein                                | phiSA_BS2 | 100 | MH028956 |
| OG0000008 | 62   | hypothetical protein                        | phiSA_BS2 | 100 | MH028956 |
| OG0000009 | 240  | LysM                                        | phiSA_BS2 | 100 | MH028956 |
| OG0000010 | 145  | hypothetical protein                        | phiSA_BS2 | 100 | MH028956 |
| OG0000011 | 263  | hypothetical protein                        | phiSA_BS2 | 100 | MH028956 |
| OG0000012 | 336  | midasin                                     | phiSA_BS2 | 100 | MH028956 |
| OG0000013 | 475  | major capsid protein                        | phiSA_BS2 | 100 | MH028956 |
| OG0000014 | 94   | hypothetical protein                        | phiSA_BS2 | 100 | MH028956 |
| OG0000015 | 304  | hypothetical protein                        | phiSA_BS2 | 100 | MH028956 |
| OG0000016 | 294  | hypothetical protein                        | phiSA_BS2 | 100 | MH028956 |
| OG0000017 | 203  | hypothetical protein                        | phiSA_BS2 | 100 | MH028956 |
| OG0000018 | 281  | hypothetical protein                        | phiSA_BS2 | 100 | MH028956 |
| OG0000019 | 72   | hypothetical protein                        | phiSA_BS2 | 100 | MH028956 |
| OG0000020 | 590  | major tail sheath                           | phiSA_BS2 | 100 | MH028956 |
| OG0000021 | 131  | hypothetical protein                        | phiSA_BS2 | 100 | MH028956 |
| OG0000022 | 184  | hypothetical protein                        | phiSA_BS2 | 100 | MH028956 |
| OG0000023 | 210  | hypothetical protein                        | phiSA_BS2 | 100 | MH028956 |
| OG0000024 | 1407 | Phage tail tape measure protein             | phiSA_BS2 | 100 | MH028956 |
| OG0000025 | 812  | secretory antigen SsaA-like protein         | phiSA_BS2 | 100 | MH028956 |
| OG0000026 | 301  | hypothetical protein                        | phiSA_BS2 | 100 | MH028956 |
| OG0000027 | 969  | glycerophosphoryl diester phosphodiesterase | phiSA_BS2 | 100 | MH028956 |
| OG0000028 | 368  | extracellular serine protease               | phiSA_BS2 | 100 | MH028956 |
| OG0000029 | 157  | hypothetical protein                        | phiSA_BS2 | 100 | MH028956 |
| OG0000030 | 267  | hypothetical protein                        | phiSA_BS2 | 100 | MH028956 |
| OG0000031 | 176  | hypothetical protein                        | phiSA_BS2 | 100 | MH028956 |
| OG0000032 | 233  | hypothetical protein                        | phiSA_BS2 | 100 | MH028956 |
| OG0000033 | 349  | Baseplate J-like protein                    | phiSA_BS2 | 100 | MH028956 |
| OG0000034 | 892  | hypothetical protein                        | phiSA_BS2 | 100 | MH028956 |
| OG0000035 | 173  | hypothetical protein                        | phiSA_BS2 | 100 | MH028956 |
| OG0000036 | 1160 | virulence-associated protein                | phiSA_BS2 | 100 | MH028956 |
| OG0000037 | 57   | hypothetical protein                        | phiSA_BS2 | 100 | MH028956 |
| OG0000038 | 660  | hypothetical protein                        | phiSA_BS2 | 100 | MH028956 |
| OG0000039 | 136  | hypothetical protein                        | phiSA_BS2 | 100 | MH028956 |

|           |     |                                             |           |     |          |
|-----------|-----|---------------------------------------------|-----------|-----|----------|
| OG0000040 | 466 | hypothetical protein                        | phiSA_BS2 | 100 | MH028956 |
| OG0000041 | 587 | Type III restriction enzyme, DNA helicase   | phiSA_BS2 | 100 | MH028956 |
| OG0000042 | 515 | hypothetical protein                        | phiSA_BS2 | 100 | MH028956 |
| OG0000043 | 482 | DNA helicase                                | phiSA_BS2 | 100 | MH028956 |
| OG0000044 | 91  | hypothetical protein                        | phiSA_BS2 | 100 | MH028956 |
| OG0000045 | 113 | hypothetical protein                        | phiSA_BS2 | 100 | MH028956 |
| OG0000046 | 94  | hypothetical protein                        | phiSA_BS2 | 100 | MH028956 |
| OG0000047 | 343 | Exonuclease SbcD, recombination exonuclease | phiSA_BS2 | 100 | MH028956 |
| OG0000048 | 126 | hypothetical protein                        | phiSA_BS2 | 100 | MH028956 |
| OG0000049 | 637 | recombination-related exonuclease           | phiSA_BS2 | 100 | MH028956 |
| OG0000050 | 213 | hypothetical protein                        | phiSA_BS2 | 100 | MH028956 |
| OG0000051 | 354 | DNA primase/helicase                        | phiSA_BS2 | 100 | MH028956 |
| OG0000052 | 105 | hypothetical protein                        | phiSA_BS2 | 100 | MH028956 |
| OG0000053 | 132 | hypothetical protein                        | phiSA_BS2 | 100 | MH028956 |
| OG0000054 | 203 | hypothetical protein                        | phiSA_BS2 | 100 | MH028956 |
| OG0000055 | 131 | ribonucleotide reduction protein            | phiSA_BS2 | 100 | MH028956 |
| OG0000056 | 705 | DNA synthesis                               | phiSA_BS2 | 100 | MH028956 |
| OG0000057 | 351 | DNA synthesis                               | phiSA_BS2 | 100 | MH028956 |
| OG0000058 | 113 | oxidoreductase                              | phiSA_BS2 | 100 | MH028956 |
| OG0000059 | 243 | hypothetical protein                        | phiSA_BS2 | 100 | MH028956 |
| OG0000060 | 100 | integration host factor                     | phiSA_BS2 | 100 | MH028956 |
| OG0000061 | 91  | hypothetical protein                        | phiSA_BS2 | 100 | MH028956 |
| OG0000062 | 820 | DNA polymerase I                            | phiSA_BS2 | 100 | MH028956 |
| OG0000063 | 242 | hypothetical protein                        | phiSA_BS2 | 100 | MH028956 |
| OG0000064 | 219 | DNA polymerase I                            | phiSA_BS2 | 100 | MH028956 |
| OG0000065 | 171 | hypothetical protein                        | phiSA_BS2 | 100 | MH028956 |
| OG0000066 | 43  | hypothetical protein                        | phiSA_BS2 | 100 | MH028956 |
| OG0000067 | 78  | hypothetical protein                        | phiSA_BS2 | 100 | MH028956 |
| OG0000068 | 45  | hypothetical protein                        | phiSA_BS2 | 100 | MH028956 |
| OG0000069 | 74  | hypothetical protein                        | phiSA_BS2 | 100 | MH028956 |
| OG0000070 | 60  | hypothetical protein                        | phiSA_BS2 | 100 | MH028956 |
| OG0000071 | 222 | hypothetical protein                        | phiSA_BS2 | 100 | MH028956 |
| OG0000072 | 198 | hypothetical protein                        | phiSA_BS2 | 100 | MH028956 |
| OG0000073 | 161 | hypothetical protein                        | phiSA_BS2 | 100 | MH028956 |
| OG0000074 | 134 | hypothetical protein                        | phiSA_BS2 | 100 | MH028956 |
| OG0000075 | 412 | hypothetical protein                        | phiSA_BS2 | 100 | MH028956 |
| OG0000076 | 74  | recombinase                                 | phiSA_BS2 | 100 | MH028956 |
| OG0000077 | 323 | hypothetical protein                        | phiSA_BS2 | 100 | MH028956 |
| OG0000078 | 315 | hypothetical protein                        | phiSA_BS2 | 100 | MH028956 |
| OG0000079 | 121 | hypothetical protein                        | phiSA_BS2 | 100 | MH028956 |

|           |     |                                           |           |     |          |
|-----------|-----|-------------------------------------------|-----------|-----|----------|
| OG0000080 | 218 | hypothetical protein                      | phiSA_BS2 | 100 | MH028956 |
| OG0000081 | 217 | hypothetical protein                      | phiSA_BS2 | 100 | MH028956 |
| OG0000082 | 84  | hypothetical protein                      | phiSA_BS2 | 100 | MH028956 |
| OG0000083 | 125 | hypothetical protein                      | phiSA_BS2 | 100 | MH028956 |
| OG0000084 | 70  | hypothetical protein                      | phiSA_BS2 | 100 | MH028956 |
| OG0000085 | 130 | Src homology 3 domain superfamily protein | phiSA_BS2 | 100 | MH028956 |
| OG0000086 | 111 | hypothetical protein                      | phiSA_BS2 | 100 | MH028956 |
| OG0000087 | 128 | hypothetical protein                      | phiSA_BS2 | 100 | MH028956 |
| OG0000088 | 243 | hypothetical protein                      | phiSA_BS2 | 100 | MH028956 |
| OG0000089 | 415 | hypothetical protein                      | phiSA_BS2 | 100 | MH028956 |
| OG0000090 | 109 | hypothetical protein                      | phiSA_BS2 | 100 | MH028956 |
| OG0000091 | 180 | hypothetical protein                      | phiSA_BS2 | 100 | MH028956 |
| OG0000092 | 251 | hypothetical protein                      | phiSA_BS2 | 100 | MH028956 |
| OG0000093 | 153 | hypothetical protein                      | phiSA_BS2 | 100 | MH028956 |
| OG0000094 | 296 | hypothetical protein                      | phiSA_BS2 | 100 | MH028956 |
| OG0000095 | 81  | hypothetical protein                      | phiSA_BS2 | 100 | MH028956 |
| OG0000096 | 247 | hypothetical protein                      | phiSA_BS2 | 100 | MH028956 |
| OG0000097 | 147 | hypothetical protein                      | phiSA_BS2 | 100 | MH028956 |
| OG0000098 | 140 | hypothetical protein                      | phiSA_BS2 | 100 | MH028956 |
| OG0000099 | 232 | hypothetical protein                      | phiSA_BS2 | 100 | MH028956 |
| OG0000100 | 128 | hypothetical protein                      | phiSA_BS2 | 100 | MH028956 |
| OG0000101 | 135 | hypothetical protein                      | phiSA_BS2 | 100 | MH028956 |
| OG0000102 | 69  | hypothetical protein                      | phiSA_BS2 | 100 | MH028956 |
| OG0000103 | 74  | hypothetical protein                      | phiSA_BS2 | 100 | MH028956 |
| OG0000104 | 53  | hypothetical protein                      | phiSA_BS2 | 100 | MH028956 |
| OG0000105 | 88  | hypothetical protein                      | phiSA_BS2 | 100 | MH028956 |
| OG0000106 | 130 | hypothetical protein                      | phiSA_BS2 | 100 | MH028956 |
| OG0000107 | 81  | hypothetical protein                      | phiSA_BS2 | 100 | MH028956 |
| OG0000108 | 362 | hypothetical protein                      | phiSA_BS2 | 100 | MH028956 |
| OG0000109 | 80  | hypothetical protein                      | phiSA_BS2 | 100 | MH028956 |
| OG0000110 | 133 | hypothetical protein                      | phiSA_BS2 | 100 | MH028956 |
| OG0000111 | 138 | hypothetical protein                      | phiSA_BS2 | 100 | MH028956 |
| OG0000112 | 210 | hypothetical protein                      | phiSA_BS2 | 100 | MH028956 |
| OG0000113 | 228 | DNA modification protein                  | phiSA_BS2 | 100 | MH028956 |
| OG0000114 | 81  | hypothetical protein                      | phiSA_BS2 | 100 | MH028956 |
| OG0000115 | 61  | hypothetical protein                      | phiSA_BS2 | 100 | MH028956 |
| OG0000116 | 57  | hypothetical protein                      | phiSA_BS2 | 100 | MH028956 |
| OG0000117 | 34  | hypothetical protein                      | phiSA_BS2 | 100 | MH028956 |
| OG0000118 | 35  | hypothetical protein                      | phiSA_BS2 | 100 | MH028956 |
| OG0000119 | 133 | hypothetical protein                      | phiSA_BS2 | 100 | MH028956 |

|           |     |                                      |           |     |          |
|-----------|-----|--------------------------------------|-----------|-----|----------|
| OG0000120 | 35  | hypothetical protein                 | phiSA_BS2 | 100 | MH028956 |
| OG0000121 | 98  | hypothetical protein                 | phiSA_BS2 | 100 | MH028956 |
| OG0000122 | 61  | hypothetical protein                 | phiSA_BS2 | 100 | MH028956 |
| OG0000123 | 308 | hypothetical protein                 | phiSA_BS2 | 100 | MH028956 |
| OG0000124 | 305 | hypothetical protein                 | phiSA_BS2 | 100 | MH028956 |
| OG0000125 | 100 | hypothetical protein                 | phiSA_BS2 | 100 | MH028956 |
| OG0000126 | 33  | hypothetical protein                 | phiSA_BS2 | 100 | MH028956 |
| OG0000127 | 72  | hypothetical protein                 | phiSA_BS2 | 100 | MH028956 |
| OG0000128 | 90  | hypothetical protein                 | phiSA_BS2 | 100 | MH028956 |
| OG0000129 | 85  | hypothetical protein                 | phiSA_BS2 | 100 | MH028956 |
| OG0000130 | 51  | hypothetical protein                 | phiSA_BS2 | 100 | MH028956 |
| OG0000131 | 49  | hypothetical protein                 | phiSA_BS2 | 100 | MH028956 |
| OG0000132 | 92  | hypothetical protein                 | phiSA_BS2 | 100 | MH028956 |
| OG0000133 | 84  | hypothetical protein                 | phiSA_BS2 | 100 | MH028956 |
| OG0000134 | 129 | hypothetical protein                 | phiSA_BS2 | 100 | MH028956 |
| OG0000135 | 65  | hypothetical protein                 | phiSA_BS2 | 100 | MH028956 |
| OG0000136 | 72  | hypothetical protein                 | phiSA_BS2 | 100 | MH028956 |
| OG0000137 | 120 | hypothetical protein                 | phiSA_BS2 | 100 | MH028956 |
| OG0000138 | 158 | hypothetical protein                 | phiSA_BS2 | 100 | MH028956 |
| OG0000139 | 30  | hypothetical protein                 | phiSA_BS2 | 100 | MH028956 |
| OG0000140 | 74  | hypothetical protein                 | phiSA_BS2 | 100 | MH028956 |
| OG0000141 | 170 | hypothetical protein                 | phiSA_BS2 | 100 | MH028956 |
| OG0000142 | 83  | hypothetical protein                 | phiSA_BS2 | 100 | MH028956 |
| OG0000143 | 165 | hypothetical protein                 | phiSA_BS2 | 100 | MH028956 |
| OG0000144 | 151 | hypothetical protein                 | phiSA_BS2 | 100 | MH028956 |
| OG0000145 | 123 | hypothetical protein                 | phiSA_BS2 | 100 | MH028956 |
| OG0000146 | 236 | serine threonine protein phosphatase | phiSA_BS2 | 100 | MH028956 |
| OG0000147 | 115 | hypothetical protein                 | phiSA_BS2 | 100 | MH028956 |
| OG0000148 | 104 | hypothetical protein                 | phiSA_BS2 | 100 | MH028956 |
| OG0000149 | 120 | hypothetical protein                 | phiSA_BS2 | 100 | MH028956 |
| OG0000150 | 80  | hypothetical protein                 | phiSA_BS2 | 100 | MH028956 |
| OG0000151 | 83  | hypothetical protein                 | phiSA_BS2 | 100 | MH028956 |
| OG0000152 | 71  | hypothetical protein                 | phiSA_BS2 | 100 | MH028956 |
| OG0000153 | 38  | hypothetical protein                 | phiSA_BS2 | 100 | MH028956 |
| OG0000154 | 76  | hypothetical protein                 | phiSA_BS2 | 100 | MH028956 |
| OG0000155 | 243 | hypothetical protein                 | phiSA_BS2 | 100 | MH028956 |
| OG0000156 | 171 | hypothetical protein                 | phiSA_BS2 | 100 | MH028956 |
| OG0000157 | 96  | hypothetical protein                 | phiSA_BS2 | 100 | MH028956 |
| OG0000158 | 61  | hypothetical protein                 | phiSA_BS2 | 100 | MH028956 |
| OG0000159 | 111 | hypothetical protein                 | phiSA_BS2 | 100 | MH028956 |

|           |     |                                             |           |     |          |
|-----------|-----|---------------------------------------------|-----------|-----|----------|
| OG0000160 | 340 | hypothetical protein                        | phiSA_BS2 | 100 | MH028956 |
| OG0000161 | 58  | hypothetical protein                        | phiSA_BS2 | 100 | MH028956 |
| OG0000162 | 126 | hypothetical protein                        | phiSA_BS2 | 100 | MH028956 |
| OG0000163 | 139 | hypothetical protein                        | phiSA_BS2 | 100 | MH028956 |
| OG0000164 | 65  | hypothetical protein                        | phiSA_BS2 | 100 | MH028956 |
| OG0000165 | 237 | HNH endonuclease                            | phiSA_BS2 | 100 | MH028956 |
| OG0000166 | 78  | hypothetical protein                        | phiSA_BS2 | 100 | MH028956 |
| OG0000167 | 78  | hypothetical protein                        | phiSA_BS2 | 100 | MH028956 |
| OG0000168 | 115 | hypothetical protein                        | phiSA_BS2 | 100 | MH028956 |
| OG0000169 | 62  | hypothetical protein                        | phiSA_BS2 | 100 | MH028956 |
| OG0000170 | 123 | hypothetical protein                        | phiSA_BS2 | 100 | MH028956 |
| OG0000171 | 145 | hypothetical protein                        | phiSA_BS2 | 100 | MH028956 |
| OG0000172 | 42  | hypothetical protein                        | phiSA_BS2 | 100 | MH028956 |
| OG0000173 | 87  | hypothetical protein                        | phiSA_BS2 | 100 | MH028956 |
| OG0000174 | 362 | RNase and PhoH-family ATPase domain protein | phiSA_BS2 | 100 | MH028956 |
| OG0000175 | 253 | PhoH family                                 | phiSA_BS2 | 100 | MH028956 |
| OG0000176 | 49  | hypothetical protein                        | phiSA_BS2 | 100 | MH028956 |
| OG0000177 | 137 | Ribonuclease                                | phiSA_BS2 | 100 | MH028956 |
| OG0000178 | 65  | hypothetical protein                        | phiSA_BS2 | 100 | MH028956 |
| OG0000179 | 202 | hypothetical protein                        | phiSA_BS2 | 100 | MH028956 |
| OG0000180 | 69  | hypothetical protein                        | phiSA_BS2 | 100 | MH028956 |
| OG0000181 | 68  | hypothetical protein                        | phiSA_BS2 | 100 | MH028956 |
| OG0000182 | 80  | hypothetical protein                        | phiSA_BS2 | 100 | MH028956 |
| OG0000183 | 548 | Phage portal protein                        | phiSA_BS2 | 100 | MH028956 |
| OG0000184 | 122 | hypothetical protein                        | phiSA_BS2 | 100 | MH028956 |
| OG0000185 | 119 | hypothetical protein                        | phiSA_BS2 | 100 | MH028956 |
| OG0000186 | 412 | ECM-binding protein homolog                 | phiSA_BS2 | 100 | MH028956 |
| OG0000187 | 117 | hypothetical protein                        | phiSA_BS2 | 100 | MH028956 |
| OG0000188 | 166 | hypothetical protein                        | phiSA_BS2 | 100 | MH028956 |
| OG0000189 | 44  | hypothetical protein                        | phiSA_BS2 | 100 | MH028956 |
| OG0000190 | 389 | terminase large subunit                     | phiSA_BS2 | 100 | MH028956 |
| OG0000191 | 320 | hypothetical protein                        | phiSA_BS2 | 100 | MH028956 |
| OG0000192 | 118 | hypothetical protein                        | phiSA_BS2 | 100 | MH028956 |
| OG0000193 | 144 | hypothetical protein                        | phiSA_BS2 | 100 | MH028956 |
| OG0000194 | 130 | hypothetical protein                        | phiSA_BS2 | 100 | MH028956 |
| OG0000195 | 108 | hypothetical protein                        | phiSA_BS2 | 100 | MH028956 |
| OG0000196 | 109 | hypothetical protein                        | phiSA_BS2 | 100 | MH028956 |
| OG0000197 | 68  | hypothetical protein                        | phiSA_BS2 | 100 | MH028956 |
| OG0000198 | 70  | hypothetical protein                        | phiSA_BS2 | 100 | MH028956 |
| OG0000199 | 101 | hypothetical protein                        | phiSA_BS2 | 100 | MH028956 |



|                        |      |                                          |           |     |          |
|------------------------|------|------------------------------------------|-----------|-----|----------|
| OG0000200              | 185  | holin                                    | phiSA_BS2 | 100 | MH028956 |
| OG0000201              | 129  | lysin                                    | phiSA_BS2 | 100 | MH028956 |
| <b>Clade IIc, n=46</b> |      |                                          |           |     |          |
| OG0000000              | 210  | lysin                                    | 676Z      | 100 | JX080302 |
| OG0000019              | 1352 | tail morphogenetic protein C             | 676Z      | 100 | JX080302 |
| OG0000020              | 705  | DNA synthesis                            | 676Z      | 100 | JX080302 |
| OG0000021              | 76   | tail morphogenetic protein I             | 676Z      | 100 | JX080302 |
| OG0000023              | 183  | hypothetical protein                     | 676Z      | 100 | JX080302 |
| OG0000024              | 209  | hypothetical protein                     | 676Z      | 100 | JX080302 |
| OG0000025              | 809  | tail murein hydrolase TAME               | 676Z      | 100 | JX080302 |
| OG0000026              | 1020 | tail morphogenetic protein F             | 676Z      | 100 | JX080302 |
| OG0000027              | 538  | hypothetical protein                     | 676Z      | 100 | JX080302 |
| OG0000029              | 214  | hypothetical protein                     | 676Z      | 100 | JX080302 |
| OG0000030              | 231  | putative transglycosylase                | 676Z      | 100 | JX080302 |
| OG0000031              | 606  | terminase large subunit                  | 676Z      | 100 | JX080302 |
| OG0000032              | 258  | prohead protease                         | 676Z      | 100 | JX080302 |
| OG0000033              | 296  | tail morphogenetic protein E             | 676Z      | 100 | JX080302 |
| OG0000034              | 175  | hypothetical protein                     | 676Z      | 100 | JX080302 |
| OG0000035              | 583  | Type III restriction enzyme, res subunit | 676Z      | 100 | JX080302 |
| OG0000036              | 252  | hypothetical protein                     | 676Z      | 100 | JX080302 |
| OG0000037              | 144  | hypothetical protein                     | 676Z      | 100 | JX080302 |
| OG0000038              | 236  | hypothetical protein                     | 676Z      | 100 | JX080302 |
| OG0000039              | 161  | hypothetical protein                     | 676Z      | 100 | JX080302 |
| OG0000040              | 109  | hypothetical protein                     | 676Z      | 100 | JX080302 |
| OG0000041              | 139  | hypothetical protein                     | 676Z      | 100 | JX080302 |
| OG0000042              | 88   | hypothetical protein                     | 676Z      | 100 | JX080302 |
| OG0000043              | 58   | hypothetical protein                     | 676Z      | 100 | JX080302 |
| OG0000044              | 193  | hypothetical protein                     | 676Z      | 100 | JX080302 |
| OG0000045              | 247  | PhoH-like protein                        | 676Z      | 100 | JX080302 |
| OG0000046              | 205  | hypothetical protein                     | 676Z      | 100 | JX080302 |
| OG0000047              | 142  | putative ribonuclease                    | 676Z      | 100 | JX080302 |
| OG0000048              | 64   | hypothetical protein                     | 676Z      | 100 | JX080302 |
| OG0000049              | 77   | hypothetical protein                     | 676Z      | 100 | JX080302 |
| OG0000050              | 168  | holin                                    | 676Z      | 100 | JX080302 |
| OG0000051              | 62   | hypothetical protein                     | 676Z      | 100 | JX080302 |
| OG0000052              | 73   | hypothetical protein                     | 676Z      | 100 | JX080302 |
| OG0000053              | 70   | hypothetical protein                     | 676Z      | 100 | JX080302 |
| OG0000054              | 111  | hypothetical protein                     | 676Z      | 100 | JX080302 |
| OG0000055              | 89   | hypothetical protein                     | 676Z      | 100 | JX080302 |
| OG0000056              | 93   | hypothetical protein                     | 676Z      | 100 | JX080302 |

|           |      |                                             |      |     |          |
|-----------|------|---------------------------------------------|------|-----|----------|
| OG0000057 | 137  | hypothetical protein                        | 676Z | 100 | JX080302 |
| OG0000058 | 274  | structural head protein                     | 676Z | 100 | JX080302 |
| OG0000059 | 160  | hypothetical protein                        | 676Z | 100 | JX080302 |
| OG0000060 | 398  | hypothetical protein                        | 676Z | 100 | JX080302 |
| OG0000061 | 117  | hypothetical protein                        | 676Z | 100 | JX080302 |
| OG0000062 | 124  | hypothetical protein                        | 676Z | 100 | JX080302 |
| OG0000063 | 564  | Phage portal protein                        | 676Z | 100 | JX080302 |
| OG0000064 | 317  | tail structural protein                     | 676Z | 100 | JX080302 |
| OG0000065 | 464  | major capsid protein                        | 676Z | 100 | JX080302 |
| OG0000066 | 99   | hypothetical protein                        | 676Z | 100 | JX080302 |
| OG0000067 | 303  | hypothetical protein                        | 676Z | 100 | JX080302 |
| OG0000068 | 293  | hypothetical protein                        | 676Z | 100 | JX080302 |
| OG0000069 | 207  | hypothetical protein                        | 676Z | 100 | JX080302 |
| OG0000070 | 279  | hypothetical protein                        | 676Z | 100 | JX080302 |
| OG0000071 | 72   | hypothetical protein                        | 676Z | 100 | JX080302 |
| OG0000072 | 588  | major tail sheath protein                   | 676Z | 100 | JX080302 |
| OG0000073 | 119  | hypothetical protein                        | 676Z | 100 | JX080302 |
| OG0000074 | 47   | hypothetical protein                        | 676Z | 100 | JX080302 |
| OG0000075 | 153  | hypothetical protein                        | 676Z | 100 | JX080302 |
| OG0000076 | 104  | hypothetical protein                        | 676Z | 100 | JX080302 |
| OG0000077 | 153  | hypothetical protein                        | 676Z | 100 | JX080302 |
| OG0000078 | 179  | tail morphogenetic protein B                | 676Z | 100 | JX080302 |
| OG0000079 | 849  | glycerophosphoryl diester phosphodiesterase | 676Z | 100 | JX080302 |
| OG0000080 | 235  | putative baseplate wedge subunit            | 676Z | 100 | JX080302 |
| OG0000081 | 349  | Baseplate J-like protein                    | 676Z | 100 | JX080302 |
| OG0000082 | 174  | baseplate morphogenetic protein C           | 676Z | 100 | JX080302 |
| OG0000083 | 1153 | virulence-associated protein                | 676Z | 100 | JX080302 |
| OG0000084 | 53   | hypothetical protein                        | 676Z | 100 | JX080302 |
| OG0000085 | 641  | hypothetical protein                        | 676Z | 100 | JX080302 |
| OG0000086 | 125  | hypothetical protein                        | 676Z | 100 | JX080302 |
| OG0000087 | 459  | structural baseplate protein                | 676Z | 100 | JX080302 |
| OG0000088 | 468  | DNA helicase B                              | 676Z | 100 | JX080302 |
| OG0000089 | 346  | recombination nuclease B                    | 676Z | 100 | JX080302 |
| OG0000090 | 640  | recombination nuclease B                    | 676Z | 100 | JX080302 |
| OG0000091 | 199  | anti-sigma factor                           | 676Z | 100 | JX080302 |
| OG0000092 | 356  | DNA primase                                 | 676Z | 100 | JX080302 |
| OG0000093 | 113  | hypothetical protein                        | 676Z | 100 | JX080302 |
| OG0000094 | 151  | hypothetical protein                        | 676Z | 100 | JX080302 |
| OG0000095 | 203  | hypothetical protein                        | 676Z | 100 | JX080302 |
| OG0000096 | 144  | ribonucleotide reductase                    | 676Z | 100 | JX080302 |

|                         |      |                                     |      |     |           |
|-------------------------|------|-------------------------------------|------|-----|-----------|
| OG0000097               | 350  | DNA synthesis                       | 676Z | 100 | JX080302  |
| OG0000098               | 107  | hypothetical protein                | 676Z | 100 | JX080302  |
| OG0000099               | 199  | hypothetical protein                | 676Z | 100 | JX080302  |
| OG0000100               | 102  | transcription factor                | 676Z | 100 | JX080302  |
| OG0000101               | 161  | hypothetical protein                | 676Z | 100 | JX080302  |
| OG0000102               | 424  | hypothetical protein                | 676Z | 100 | JX080302  |
| OG0000103               | 419  | putative repair recombinase to RecA | 676Z | 100 | JX080302  |
| OG0000104               | 118  | hypothetical protein                | 676Z | 100 | JX080302  |
| OG0000105               | 221  | putative RNA polymerase             | 676Z | 100 | JX080302  |
| OG0000106               | 211  | hypothetical protein                | 676Z | 100 | JX080302  |
| OG0000107               | 87   | hypothetical protein                | 676Z | 100 | JX080302  |
| OG0000108               | 417  | hypothetical protein                | 676Z | 100 | JX080302  |
| OG0000109               | 179  | hypothetical protein                | 676Z | 100 | JX080302  |
| OG0000110               | 256  | hypothetical protein                | 676Z | 100 | JX080302  |
| OG0000111               | 149  | hypothetical protein                | 676Z | 100 | JX080302  |
| OG0000112               | 244  | hypothetical protein                | 676Z | 100 | JX080302  |
| OG0000113               | 153  | hypothetical protein                | 676Z | 100 | JX080302  |
| OG0000114               | 148  | hypothetical protein                | 676Z | 100 | JX080302  |
| OG0000115               | 235  | hypothetical protein                | 676Z | 100 | JX080302  |
| OG0000116               | 133  | hypothetical protein                | 676Z | 100 | JX080302  |
| <b>Clade IIIa, n=29</b> |      |                                     |      |     |           |
| OG0000001               | 55   |                                     | 3A   | 100 | NC_007053 |
| OG0000003               | 456  | DEAD/DEAH box helicase              | 3A   | 100 | NC_007053 |
| OG0000004               | 108  | terminase small subunit             | 3A   | 100 | NC_007053 |
| OG0000005               | 564  | Terminase, large subunit            | 3A   | 100 | NC_007053 |
| OG0000006               | 413  | portal protein                      | 3A   | 100 | NC_007053 |
| OG0000007               | 256  | ATP-dependent Clp protease          | 3A   | 100 | NC_007053 |
| OG0000008               | 403  | major capsid protein                | 3A   | 100 | NC_007053 |
| OG0000009               | 93   | head-tail connector protein         | 3A   | 100 | NC_007053 |
| OG0000010               | 111  | hypothetical protein                | 3A   | 100 | NC_007053 |
| OG0000011               | 134  | hypothetical protein                | 3A   | 100 | NC_007053 |
| OG0000012               | 132  | hypothetical protein                | 3A   | 100 | NC_007053 |
| OG0000013               | 214  | tail protein                        | 3A   | 100 | NC_007053 |
| OG0000014               | 152  | Phage tail tape measure protein     | 3A   | 100 | NC_007053 |
| OG0000015               | 117  | hypothetical protein                | 3A   | 100 | NC_007053 |
| OG0000016               | 53   | hypothetical protein                | 3A   | 100 | NC_007053 |
| OG0000017               | 1658 | tail tape measure protein           | 3A   | 100 | NC_007053 |
| OG0000018               | 275  | Phage tail protein                  | 3A   | 100 | NC_007053 |
| OG0000019               | 528  | tail protein                        | 3A   | 100 | NC_007053 |
| OG0000020               | 97   | hypothetical protein                | 3A   | 100 | NC_007053 |

|                         |      |                                      |           |     |           |
|-------------------------|------|--------------------------------------|-----------|-----|-----------|
| OG0000021               | 637  | Teichoic acid biosynthesis protein C | 3A        | 100 | NC_007053 |
| OG0000023               | 104  | hypothetical protein                 | 3A        | 100 | NC_007053 |
| OG0000024               | 116  | holin                                | 3A        | 100 | NC_007053 |
| OG0000025               | 485  | lysin                                | 3A        | 100 | NC_007053 |
| OG0000026               | 62   | hypothetical protein                 | 3A        | 100 | NC_007053 |
| OG0000027               | 135  | PVL family protein                   | 3A        | 100 | NC_007053 |
| OG0000028               | 51   | hypothetical protein                 | 3A        | 100 | NC_007053 |
| OG0000029               | 78   | hypothetical protein                 | 3A        | 100 | NC_007053 |
| <b>Clade IIIb, n=16</b> |      |                                      |           |     |           |
| OG0000000               | 1262 | Minor structural protein             | 23MRA     | 100 | NC_028775 |
| OG0000001               | 708  | Tape measure protein                 | 23MRA     | 100 | NC_028775 |
| OG0000002               | 396  | Phage portal protein                 | 23MRA     | 100 | NC_028775 |
| OG0000003               | 93   | HNH endonuclease                     | 23MRA     | 100 | NC_028775 |
| OG0000004               | 139  | transcriptional                      | 23MRA     | 100 | NC_028775 |
| OG0000005               | 81   | PVL                                  | 23MRA     | 100 | NC_028775 |
| OG0000006               | 126  | hypothetical protein                 | 23MRA     | 100 | NC_028775 |
| OG0000007               | 87   | hypothetical protein                 | 23MRA     | 100 | NC_028775 |
| OG0000009               | 238  | hypothetical protein                 | 23MRA     | 100 | NC_028775 |
| OG0000010               | 96   | hypothetical protein                 | 23MRA     | 100 | NC_028775 |
| OG0000011               | 51   | hypothetical protein                 | 23MRA     | 100 | NC_028775 |
| OG0000012               | 495  | Phage tail protein                   | 23MRA     | 100 | NC_028775 |
| OG0000013               | 117  | hypothetical protein                 | 23MRA     | 100 | NC_028775 |
| OG0000014               | 215  | Major tail protein                   | 23MRA     | 100 | NC_028775 |
| OG0000015               | 135  | hypothetical protein                 | 23MRA     | 100 | NC_028775 |
| OG0000016               | 135  | hypothetical protein                 | 23MRA     | 100 | NC_028775 |
| OG0000017               | 121  | head-tail adaptor protein            | 23MRA     | 100 | NC_028775 |
| OG0000018               | 99   | head-tail adapter protein            | 23MRA     | 100 | NC_028775 |
| OG0000019               | 87   | hypothetical protein                 | 23MRA     | 100 | NC_028775 |
| OG0000020               | 382  | major capsid protein                 | 23MRA     | 100 | NC_028775 |
| OG0000021               | 248  | ATP-dependent Clp protease           | 23MRA     | 100 | NC_028775 |
| OG0000022               | 554  | Terminase, large subunit             | 23MRA     | 100 | NC_028775 |
| OG0000023               | 134  | hypothetical protein                 | 23MRA     | 100 | NC_028775 |
| <b>Clade IIIc, n=11</b> |      |                                      |           |     |           |
| OG0000000               | 1551 | Tape measure protein                 | 3_AJ_2017 | 100 | KX232515  |
| OG0000001               | 1262 | Minor structural protein             | 3_AJ_2017 | 100 | KX232515  |
| OG0000002               | 497  | tail length tape-measure protein     | 3_AJ_2017 | 100 | KX232515  |
| OG0000003               | 126  | hypothetical protein                 | 3_AJ_2017 | 100 | KX232515  |
| OG0000004               | 96   | hypothetical protein                 | 3_AJ_2017 | 100 | KX232515  |
| OG0000005               | 149  | hypothetical protein                 | 3_AJ_2017 | 100 | KX232515  |
| OG0000006               | 318  | hypothetical protein                 | 3_AJ_2017 | 100 | KX232515  |

|                          |     |                                            |           |     |           |
|--------------------------|-----|--------------------------------------------|-----------|-----|-----------|
| OG0000007                | 127 | hypothetical protein                       | 3_AJ_2017 | 100 | KX232515  |
| OG0000008                | 112 | hypothetical protein                       | 3_AJ_2017 | 100 | KX232515  |
| OG0000009                | 53  | hypothetical protein                       | 3_AJ_2017 | 100 | KX232515  |
| OG0000010                | 416 | capsid protein                             | 3_AJ_2017 | 100 | KX232515  |
| OG0000011                | 195 | Prohead protease                           | 3_AJ_2017 | 100 | KX232515  |
| OG0000012                | 417 | portal protein                             | 3_AJ_2017 | 100 | KX232515  |
| OG0000013                | 80  | hypothetical protein                       | 3_AJ_2017 | 100 | KX232515  |
| OG0000014                | 565 | Terminase, large subunit                   | 3_AJ_2017 | 100 | KX232515  |
| OG0000015                | 156 | phage terminase small subunit              | 3_AJ_2017 | 100 | KX232515  |
| OG0000016                | 115 | HNH endonuclease                           | 3_AJ_2017 | 100 | KX232515  |
| OG0000017                | 151 | Mazg nucleotide pyrophosphohydrolase       | 3_AJ_2017 | 100 | KX232515  |
| OG0000018                | 173 | Bacterial regulatory proteins, luxR family | 3_AJ_2017 | 100 | KX232515  |
| OG0000019                | 67  | hypothetical protein                       | 3_AJ_2017 | 100 | KX232515  |
| OG0000020                | 50  | hypothetical protein                       | 3_AJ_2017 | 100 | KX232515  |
| OG0000021                | 69  | hypothetical protein                       | 3_AJ_2017 | 100 | KX232515  |
| OG0000022                | 82  | hypothetical protein                       | 3_AJ_2017 | 100 | KX232515  |
| OG0000023                | 81  | hypothetical protein                       | 3_AJ_2017 | 100 | KX232515  |
| OG0000024                | 115 | hypothetical protein                       | 3_AJ_2017 | 100 | KX232515  |
| OG0000025                | 157 | single-stranded DNA-binding protein        | 3_AJ_2017 | 100 | KX232515  |
| OG0000026                | 87  | hypothetical protein                       | 3_AJ_2017 | 100 | KX232515  |
| <b>Clade IIIId, n=22</b> |     |                                            |           |     |           |
| OG0000000                | 391 | baseplate upper protein                    | 11        | 100 | NC_004615 |
| OG0000001                | 482 | lysin                                      | 11        | 100 | NC_004615 |
| OG0000002                | 87  | hypothetical protein                       | 11        | 100 | NC_004615 |
| OG0000003                | 120 | hypothetical protein                       | 11        | 100 | NC_004615 |
| OG0000004                | 83  | hypothetical protein                       | 11        | 100 | NC_004615 |
| OG0000005                | 85  | hypothetical protein                       | 11        | 100 | NC_004615 |
| OG0000006                | 63  | hypothetical protein                       | 11        | 100 | NC_004615 |
| OG0000007                | 141 | RinA family transcriptional activator      | 11        | 100 | NC_004615 |
| OG0000008                | 151 | terminase small Subunit                    | 11        | 100 | NC_004615 |
| OG0000009                | 426 | Phage terminase, large subunit             | 11        | 100 | NC_004615 |
| OG0000010                | 512 | portal protein                             | 11        | 100 | NC_004615 |
| OG0000011                | 332 | minor capsid protein                       | 11        | 100 | NC_004615 |
| OG0000012                | 57  | hypothetical protein                       | 11        | 100 | NC_004615 |
| OG0000013                | 212 | hypothetical protein                       | 11        | 100 | NC_004615 |
| OG0000014                | 325 | head protein                               | 11        | 100 | NC_004615 |
| OG0000015                | 96  | hypothetical protein                       | 11        | 100 | NC_004615 |
| OG0000016                | 111 | head-tail connector protein                | 11        | 100 | NC_004615 |
| OG0000017                | 101 | hypothetical protein                       | 11        | 100 | NC_004615 |
| OG0000018                | 116 | hypothetical protein                       | 11        | 100 | NC_004615 |

|                         |      |                                      |    |     |           |
|-------------------------|------|--------------------------------------|----|-----|-----------|
| OG0000019               | 128  | hypothetical protein                 | 11 | 100 | NC_004615 |
| OG0000020               | 194  | tail protein                         | 11 | 100 | NC_004615 |
| OG0000021               | 122  | tail assembly chaperone              | 11 | 100 | NC_004615 |
| OG0000022               | 115  | hypothetical protein                 | 11 | 100 | NC_004615 |
| OG0000023               | 1156 | hypothetical protein                 | 11 | 100 | NC_004615 |
| OG0000024               | 316  | tail family protein                  | 11 | 100 | NC_004615 |
| OG0000025               | 634  | tail protein                         | 11 | 100 | NC_004615 |
| OG0000026               | 637  | minor structural protein             | 11 | 100 | NC_004615 |
| OG0000027               | 608  | hypothetical protein                 | 11 | 100 | NC_004615 |
| OG0000028               | 126  | hypothetical protein                 | 11 | 100 | NC_004615 |
| OG0000029               | 58   | hypothetical protein                 | 11 | 100 | NC_004615 |
| OG0000030               | 104  | hypothetical protein                 | 11 | 100 | NC_004615 |
| OG0000031               | 633  | lysin                                | 11 | 100 | NC_004615 |
| <b>Clade IIIe, n=28</b> |      |                                      |    |     |           |
| OG0000000               | 86   | hypothetical protein                 | 29 | 100 | NC_007061 |
| OG0000001               | 493  | Portal protein                       | 29 | 100 | NC_007061 |
| OG0000002               | 321  | minor head protein                   | 29 | 100 | NC_007061 |
| OG0000003               | 105  | head-tail connector protein          | 29 | 100 | NC_007061 |
| OG0000004               | 112  | head closure protein                 | 29 | 100 | NC_007061 |
| OG0000005               | 138  | hypothetical protein                 | 29 | 100 | NC_007061 |
| OG0000006               | 146  | hypothetical protein                 | 29 | 100 | NC_007061 |
| OG0000007               | 187  | hypothetical protein                 | 29 | 100 | NC_007061 |
| OG0000008               | 165  | hypothetical protein                 | 29 | 100 | NC_007061 |
| OG0000009               | 106  | hypothetical protein                 | 29 | 100 | NC_007061 |
| OG0000010               | 1048 | terminase                            | 29 | 100 | NC_007061 |
| OG0000011               | 312  | tail family protein                  | 29 | 100 | NC_007061 |
| OG0000012               | 629  | tail protein                         | 29 | 100 | NC_007061 |
| OG0000013               | 633  | Teichoic acid biosynthesis protein C | 29 | 100 | NC_007061 |
| OG0000014               | 608  | hypothetical protein                 | 29 | 100 | NC_007061 |
| OG0000015               | 126  | hypothetical protein                 | 29 | 100 | NC_007061 |
| OG0000016               | 61   | hypothetical protein                 | 29 | 100 | NC_007061 |
| OG0000017               | 104  | hypothetical protein                 | 29 | 100 | NC_007061 |
| OG0000018               | 625  | lysin                                | 29 | 100 | NC_007061 |
| OG0000020               | 99   | hypothetical protein                 | 29 | 100 | NC_007061 |
| OG0000021               | 124  | hypothetical protein                 | 29 | 100 | NC_007061 |
| OG0000022               | 83   | hypothetical protein                 | 29 | 100 | NC_007061 |
| OG0000023               | 59   | transcriptional activator RinB       | 29 | 100 | NC_007061 |
